# Supplementary material for: Radiologic Measurements in the Assessment of Patellar Instability: A Systematic Review and Meta-analysis
Source: PubMed Central journal article supplement — Orthop J Sports Med. 2021 May 20;9(5):2325967121993179. doi: 10.1177/2325967121993179 (PMC8142007; doi:10.1177/2325967121993179), 2021-05-20
Supplement: sj-pdf-1-ojs-10.1177_2325967121993179.pdf [file sj-pdf-1-ojs-10.1177_2325967121993179.pdf]

## APPENDIX 1

**Appendix Table A1.** List of measurements with number of studies and categorization of each measurement

| Measurement                                         | No. of Studies | Category                | Measurement                                     | No. of Studies | Category                |
|-----------------------------------------------------|----------------|-------------------------|-------------------------------------------------|----------------|-------------------------|
| TT-TG mean                                          | 59             | Patellar tracking       | 3D flexion angle                                | 1              | Patellar tracking       |
| Insall-Salvati / modified Insall-Salvati ratio      | 26             | Patellar height         | 3D hip-knee-ankle angle                         | 1              | Patellar tracking       |
| Caton-Deschamps ratio                               | 26             | Patellar height         | Angle of Fulkerson                              | 1              | Trochlear morphology    |
| Patellar tilt / inclination angle                   | 22             | Patellar inclination    | Angle of Grelsamer                              | 1              | Patellar inclination    |
| Femoral / trochlear sulcus angle                    | 19             | Trochlear morphology    | Anterior condylar angle                         | 1              | Trochlear morphology    |
| Congruence / Merchant angle                         | 13             | Patellar tracking       | Femoral sulcus depth                            | 1              | Patellar tracking       |
| Dejour classification                               | 12             | Trochlear morphology    | Femur torsion                                   | 1              | Patellar tracking       |
| Trochlear groove depth                              | 10             | Trochlear morphology    | Interepicondylar distance (axial and coronal)   | 1              | Soft tissue description |
| Lateral trochlear or facet inclination / tilt angle | 9              | Trochlear morphology    | Lateral condyle index                           | 1              | Trochlear morphology    |
| Patellar lateral displacement shift                 | 9              | Patellar tracking       | Lateral facet size                              | 1              | Trochlear morphology    |
| TT-PCL distance/ratio                               | 9              | Patellar tracking       | Lateral patellar edge                           | 1              | Patellar tracking       |
| 2D/3D knee rotation angle                           | 6              | Patellar tracking       | Lateral stress shift ratio                      | 1              | Soft tissue description |
| Lateral patellofemoral angle                        | 6              | Patellar inclination    | Lateral tracking                                | 1              | Patellar tracking       |
| Tibial/Tibial tubercle torsion                      | 6              | Patellar tracking       | Maldague stage                                  | 1              | Patellar inclination    |
| Blackburne-Peel (BP) ratio                          | 5              | Patellar height         | Malleolar condylar angle                        | 1              | Patellar tracking       |
| Femorotibial / femoral joint angle                  | 5              | Patellar tracking       | Maximal mediolateral axis ratio to TT-TG        | 1              | Patellar tracking       |
| Medial condylar height/size                         | 5              | Trochlear morphology    | Mechanical proximal medial tibial angle (mPMTA) | 1              | Patellar tracking       |
| MPFL thickness                                      | 5              | Soft tissue description | Medial facet size                               | 1              | Trochlear morphology    |
| Patellar trochlear index (PTI)                      | 5              | Patellar height         | Medial stress shift ratio                       | 1              | Soft tissue description |
| Q-angle                                             | 5              | Patellar tracking       | Medial trochlear slope                          | 1              | Trochlear morphology    |
| Trochlear facet asymmetry                           | 5              | Trochlear morphology    | Morphology ratio                                | 1              | Patellar height         |
| Bisect offset %                                     | 4              | Patellar tracking       | Overall torsion                                 | 1              | Patellar tracking       |
| Femoral anteversion                                 | 4              | Patellar tracking       | P-TE distance                                   | 1              | Patellar height         |
| Lateral condylar height / size                      | 4              | Trochlear morphology    | Patella alta                                    | 1              | Patellar height         |
| Central trochlear / condylar height                 | 3              | Trochlear morphology    | Patella edema                                   | 1              | Soft tissue description |
| Distal lateral femoral angle                        | 3              | Patellar tracking       | Patella shape                                   | 1              | Patellar morphology     |
| Patella articular overlap                           | 3              | Patellar height         | Patellar linear displacement                    | 1              | Patellar tracking       |
| PT-TG distance                                      | 3              | Patellar tracking       | Patellar tendon length                          | 1              | Soft tissue description |
| Trochlear length                                    | 3              | Trochlear morphology    | Patellofemoral contacting surface ratio         | 1              | Patellar height         |
| VMO morphology                                      | 3              | Soft tissue description | PT-PCL distance                                 | 1              | Patellar tracking       |
| Condyle asymmetry                                   | 2              | Trochlear morphology    | PT-TG angle                                     | 1              | Patellar tracking       |
| Index of patellar height                            | 2              | Patellar height         | PT-TT distance                                  | 1              | Patellar tracking       |
| J-sign                                              | 2              | Patellar tracking       | PTG distance                                    | 1              | Patellar tracking       |

|                                                   |   |                         |                                     |   |                         |
|---------------------------------------------------|---|-------------------------|-------------------------------------|---|-------------------------|
| Lateral-to-medial trochlear ratio / ETIT          | 2 | Trochlear morphology    | Relative central trochlear height   | 1 | Trochlear morphology    |
| Lateral trochlear slope                           | 2 | Patellar tracking       | Relative lateral trochlear height   | 1 | Trochlear morphology    |
| Laurin angle                                      | 2 | Patellar tracking       | Relative medial trochlear height    | 1 | Trochlear morphology    |
| Mechanical axis deviation                         | 2 | Patellar tracking       | Relative transverse trochlear shift | 1 | Trochlear morphology    |
| Medial trochlear / lateral trochlear height ratio | 2 | Trochlear morphology    | Roman arch                          | 1 | Soft tissue description |
| MPFL length                                       | 2 | Soft tissue description | Slope asymmetry                     | 1 | Patellar tracking       |
| Outerbridge score                                 | 2 | Soft tissue description | TC-TB distance                      | 1 | Patellar tracking       |
| Patellar length                                   | 2 | Patellar morphology     | Tibial plateau angle                | 1 | Patellar tracking       |
| Patellar width / patellar width ratio (PWR)       | 2 | Patellar morphology     | Trochlear angle                     | 1 | Trochlear morphology    |
| Patellofemoral axial engagement index             | 2 | Patellar tracking       | Trochlear bump                      | 1 | Trochlear morphology    |
| Posterior condylar angle                          | 2 | Trochlear morphology    | Trochlear dysplasia index           | 1 | Trochlear morphology    |
| Sagittal patellar engagement                      | 2 | Patellar height         | Trochlear groove area               | 1 | Trochlear morphology    |
| Tibial slope                                      | 2 | Patellar tracking       | Trochlear groove medialization      | 1 | Trochlear morphology    |
| Tibial tubercle lateralization (TTL)              | 2 | Patellar tracking       | Trochlear groove thickness          | 1 | Trochlear morphology    |
| Trochlear bossing                                 | 2 | Trochlear morphology    | Trochlear shape                     | 1 | Trochlear morphology    |
| Trochlear prominence                              | 2 | Trochlear morphology    | Trochlear volume                    | 1 | Trochlear morphology    |
| Wiberg classification                             | 2 | Patellar morphology     | Trochlear width                     | 1 | Trochlear morphology    |
| % of epicondylar height CCH                       | 1 | Trochlear morphology    | TT-PT distance                      | 1 | Patellar tracking       |
| % of epicondylar width LCH                        | 1 | Trochlear morphology    | TT-TG index                         | 1 | Patellar tracking       |
| % of epicondylar width MCH                        | 1 | Trochlear morphology    |                                     |   |                         |
| % of epicondylar width TGT                        | 1 | Trochlear morphology    |                                     |   |                         |

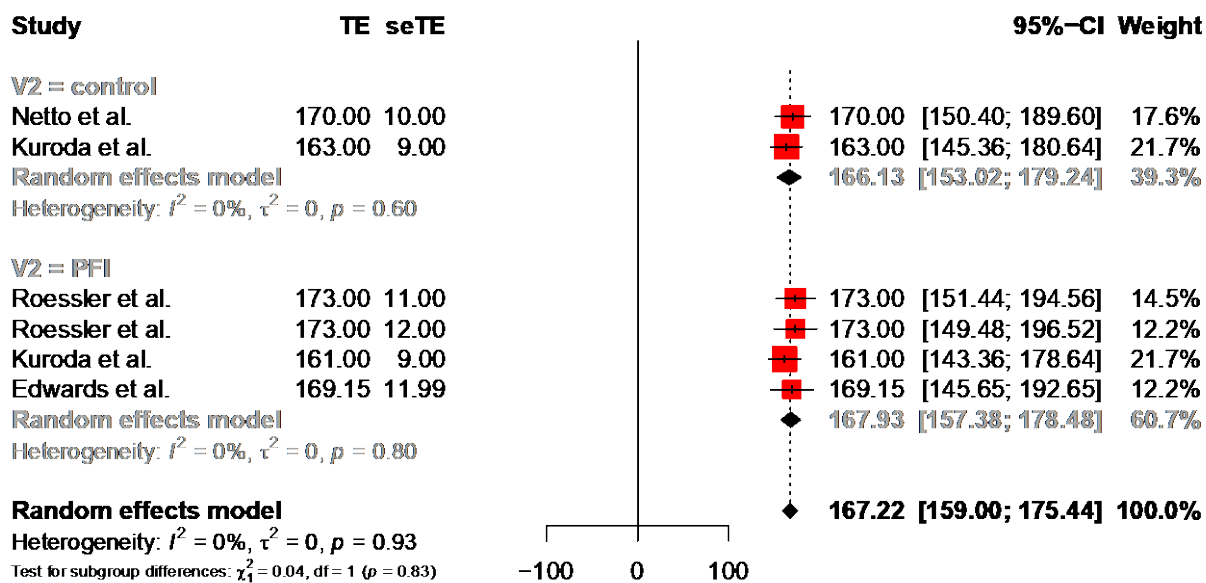

Appendix Figure A1. Patient Height, PFI vs. Control

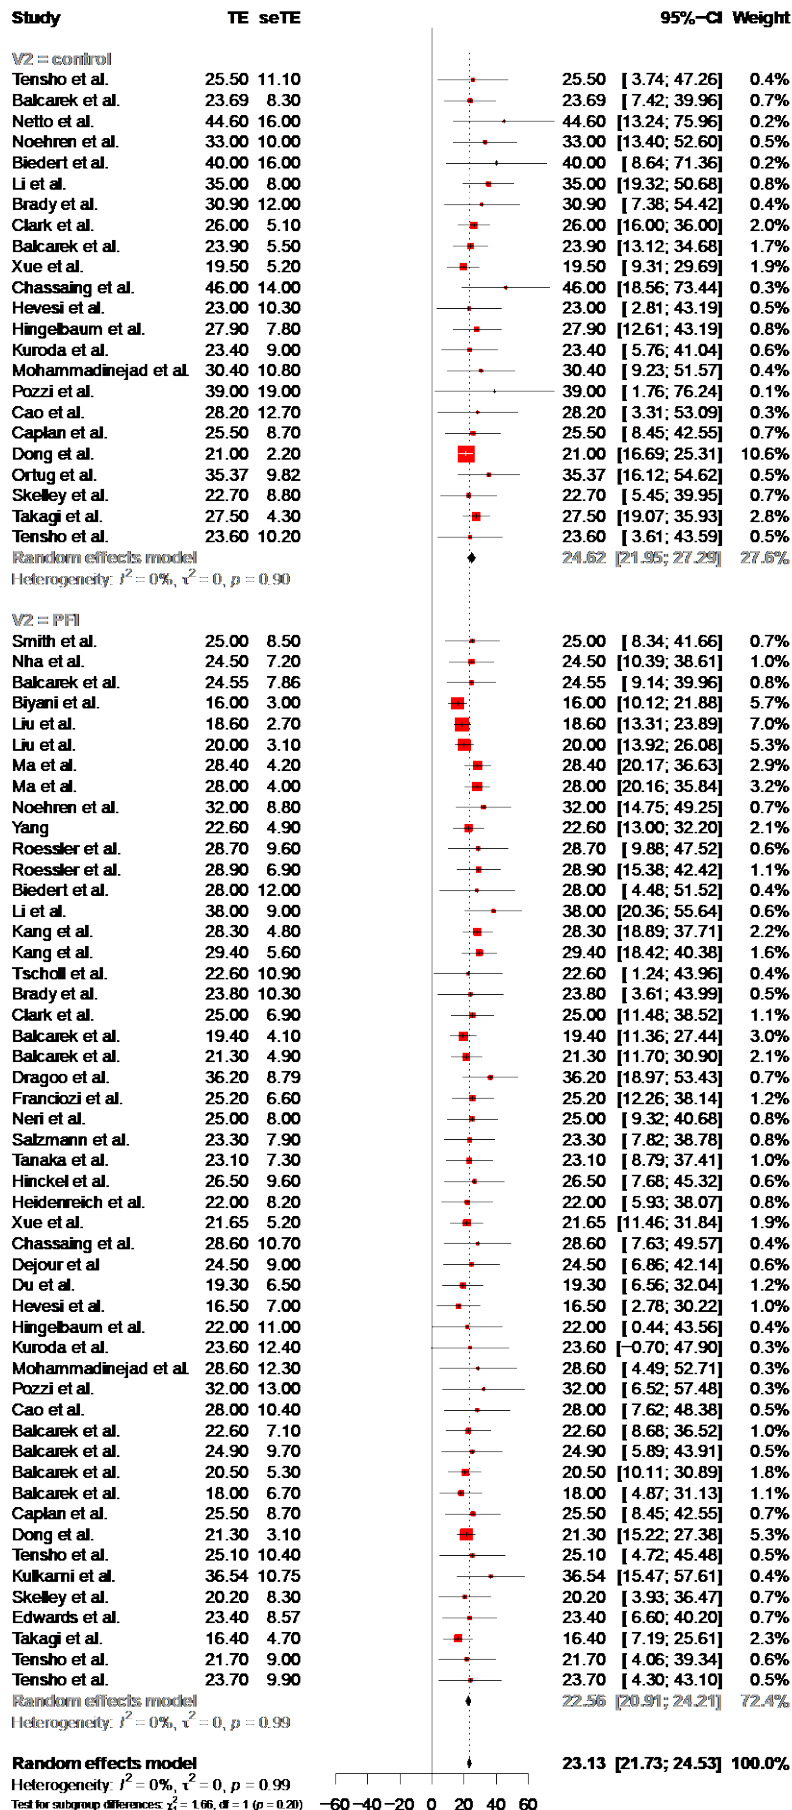

Appendix Figure A2. Patient Age, PFI vs. Control

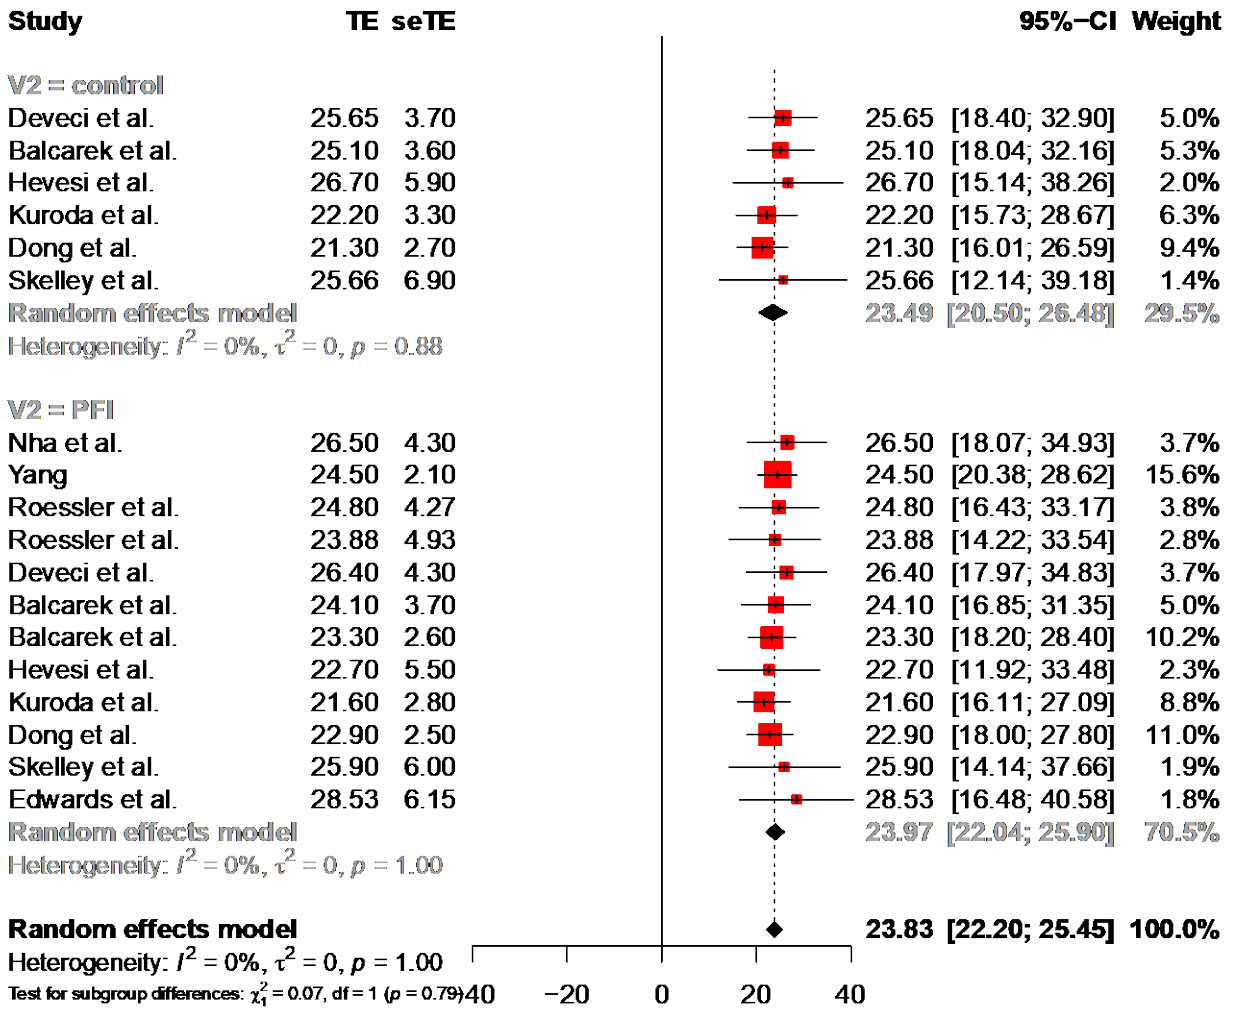

Appendix Figure A3. Patient BMI, PFI vs. Control

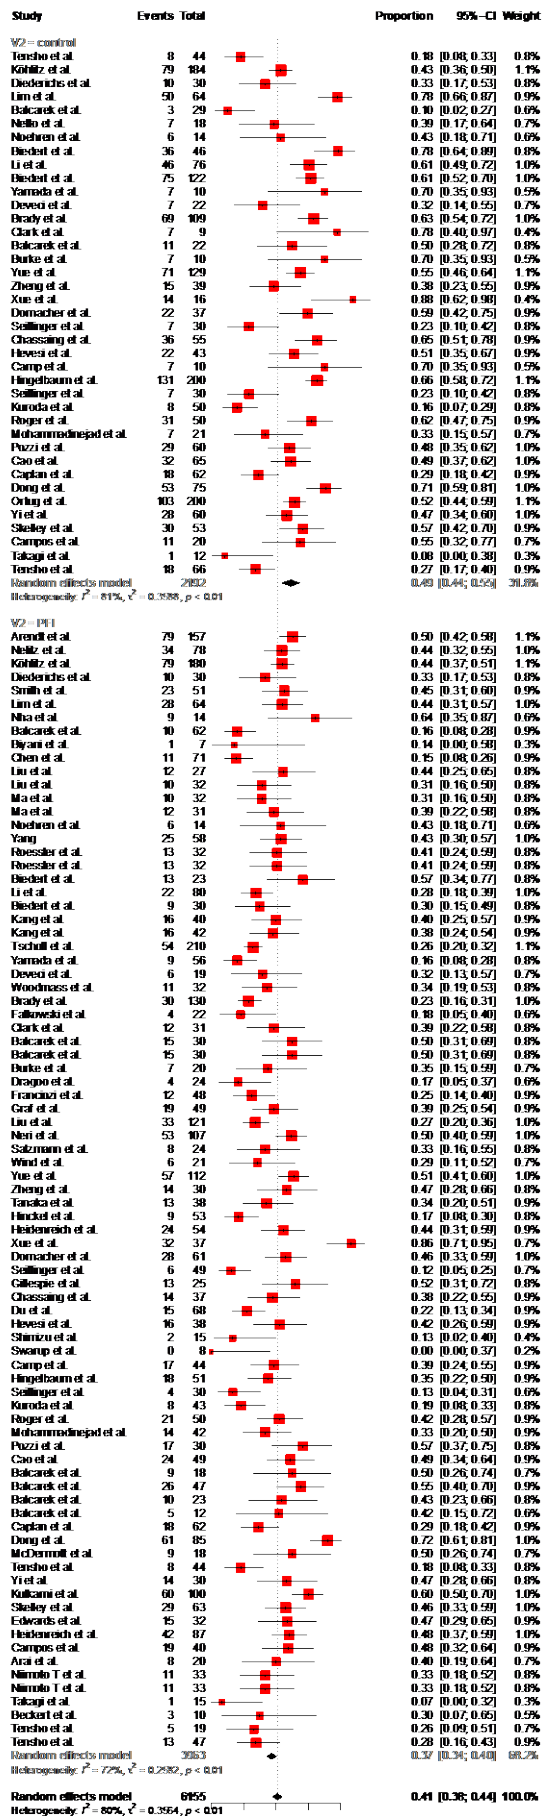

Appendix Figure A4. Patient Sex

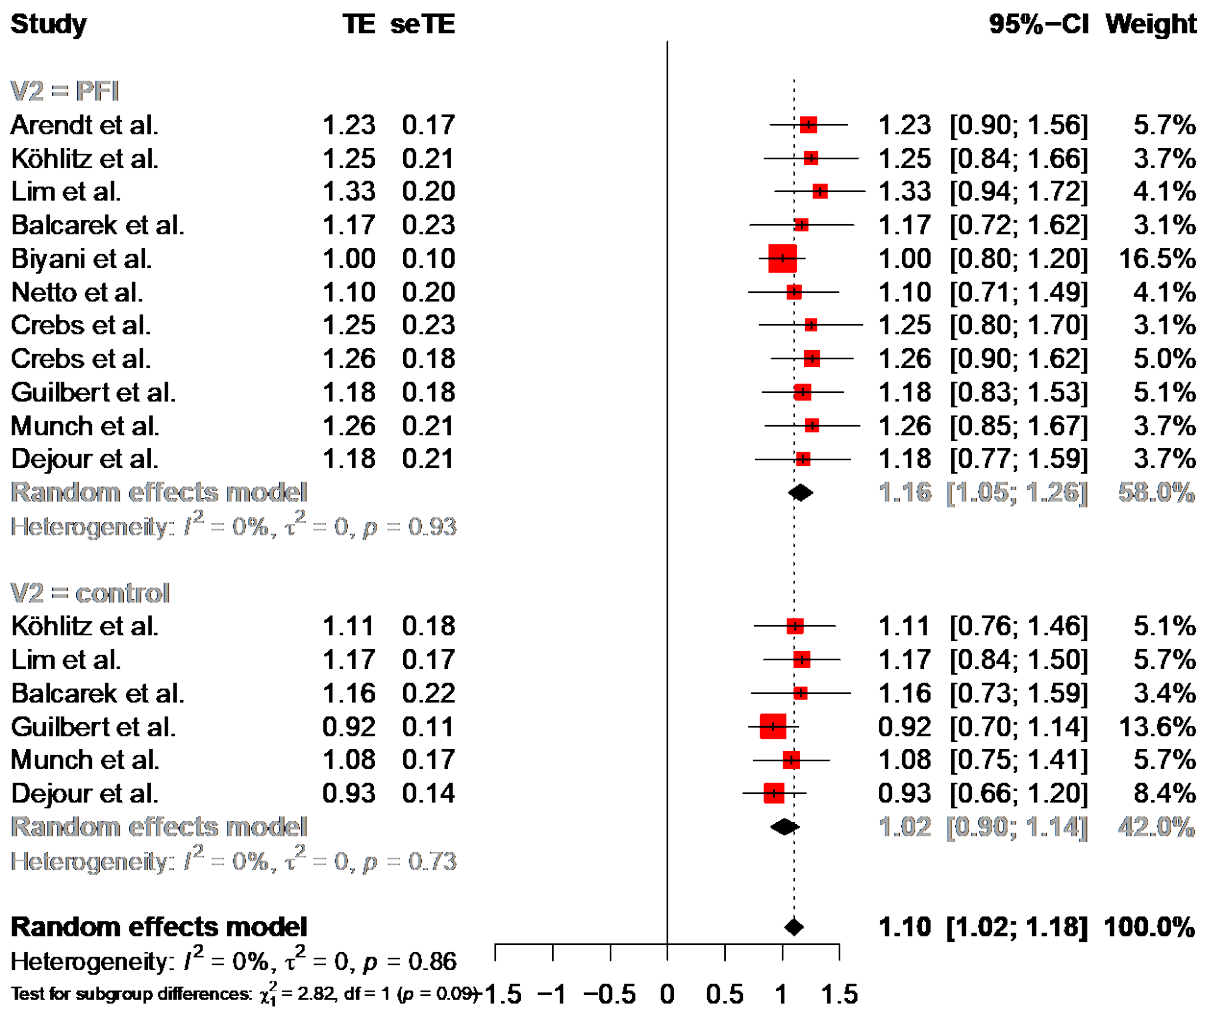

Appendix Figure A5. Caton-Deschamps on MRI, PFI vs. Control

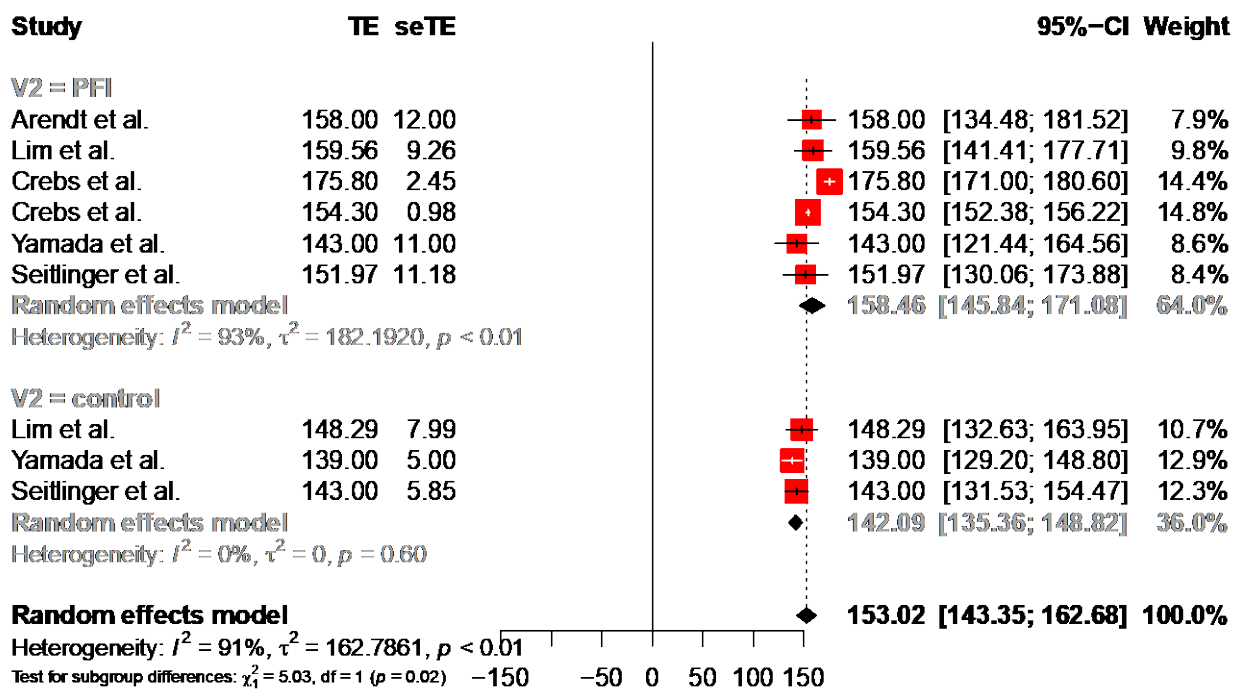

Appendix Figure A6. Femoral Sulcus Angle on MRI, PFI vs. Control

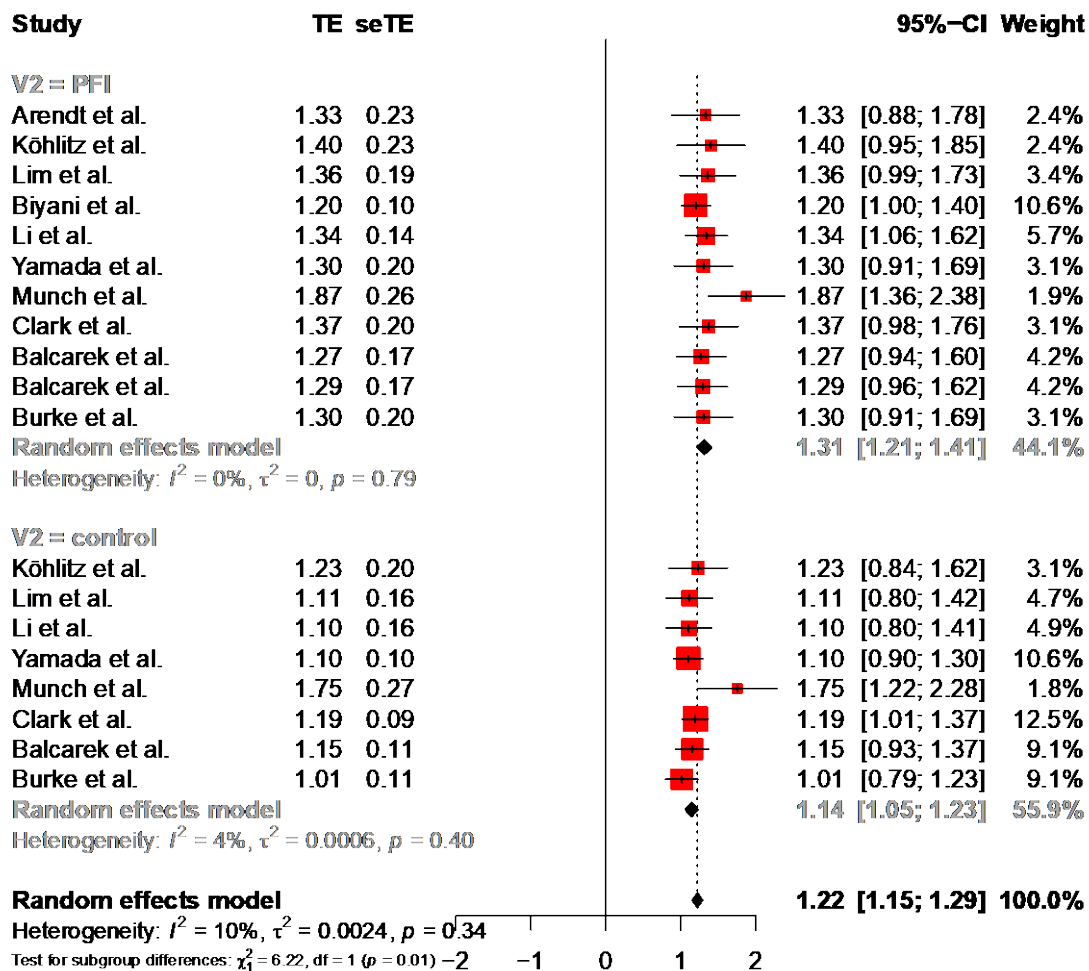

Appendix Figure A7. Insall-Salvati Ratio on MRI, PFI vs. Control

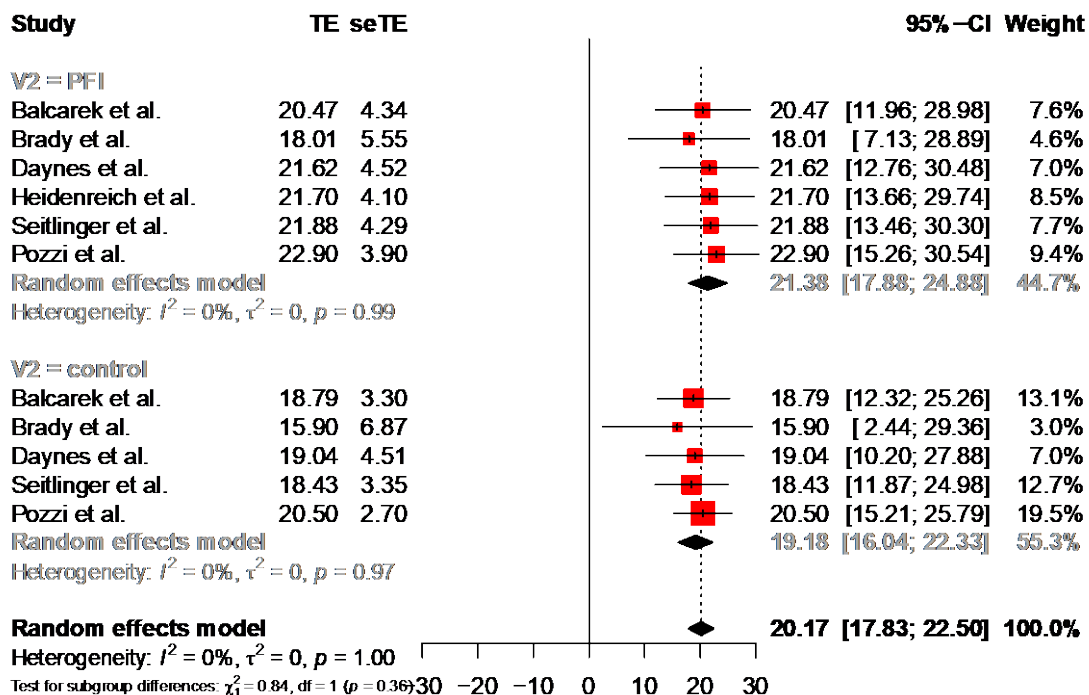

Appendix Figure A8. TT-PCL on MRI, PFI vs. Control



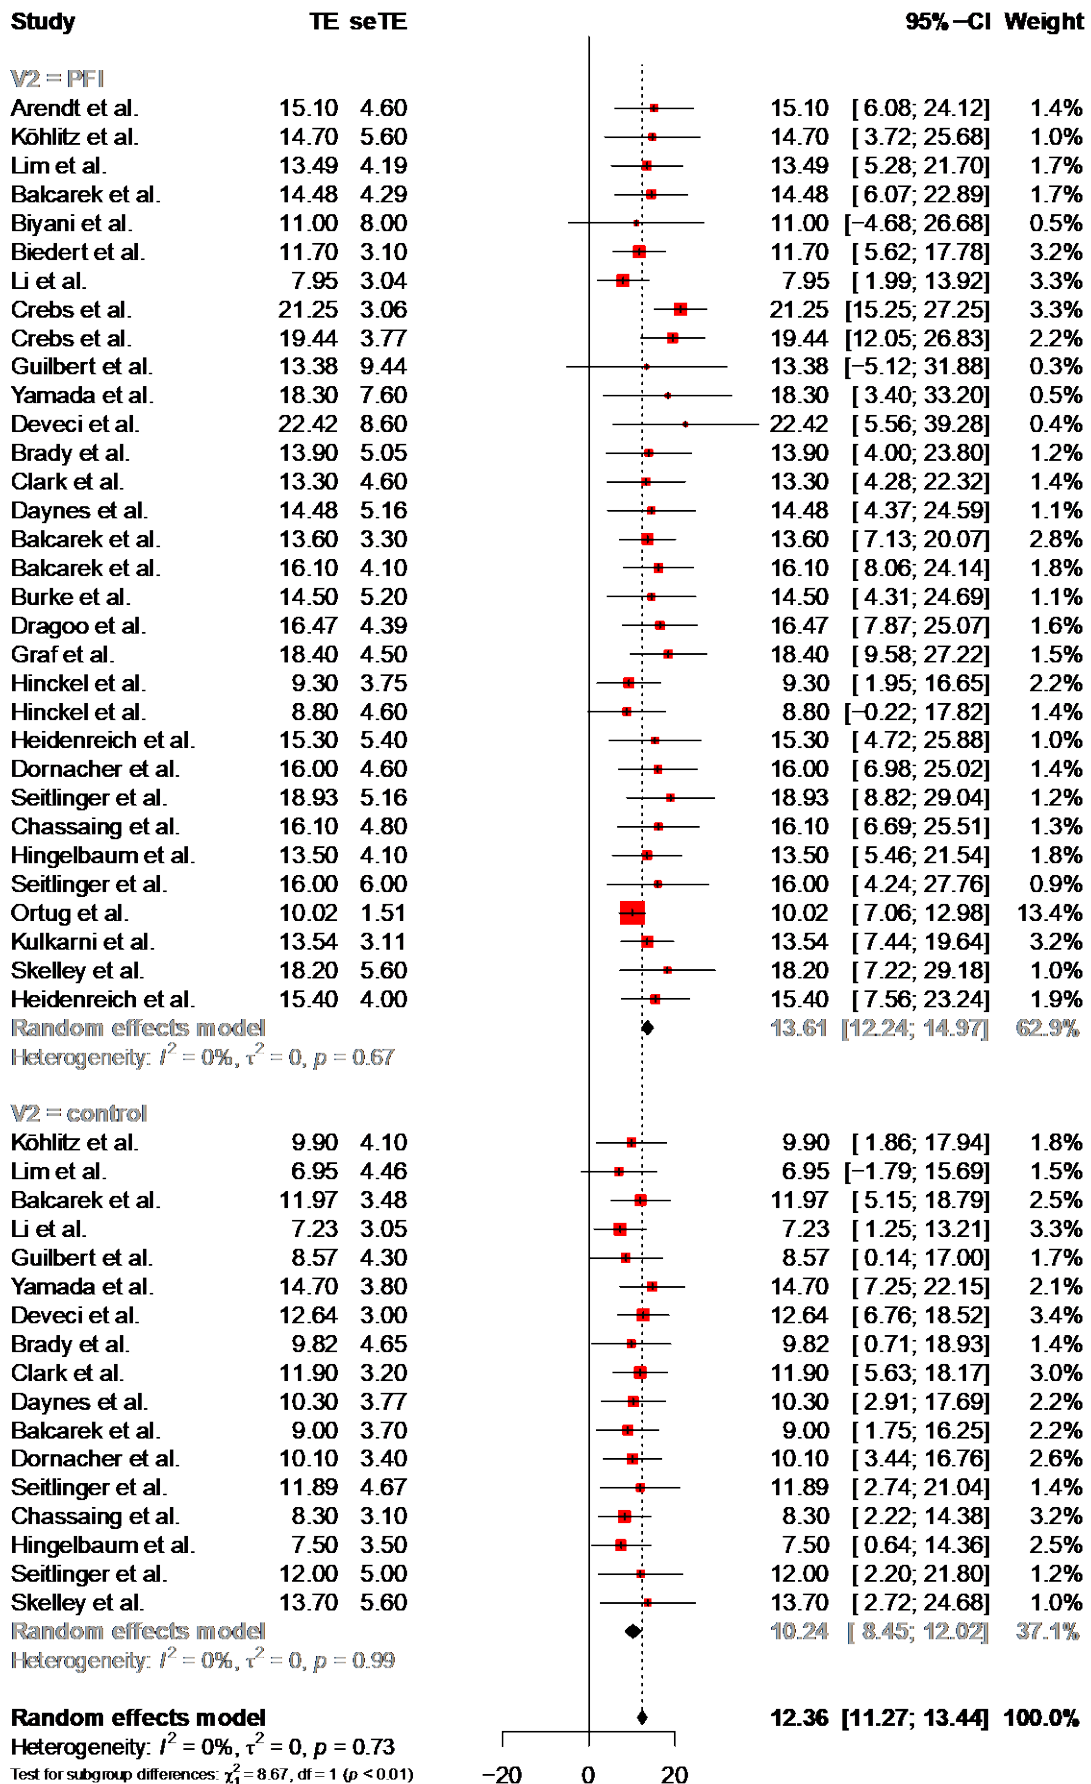

Appendix Figure A9. TT-TG on MRI, PFI vs. Control

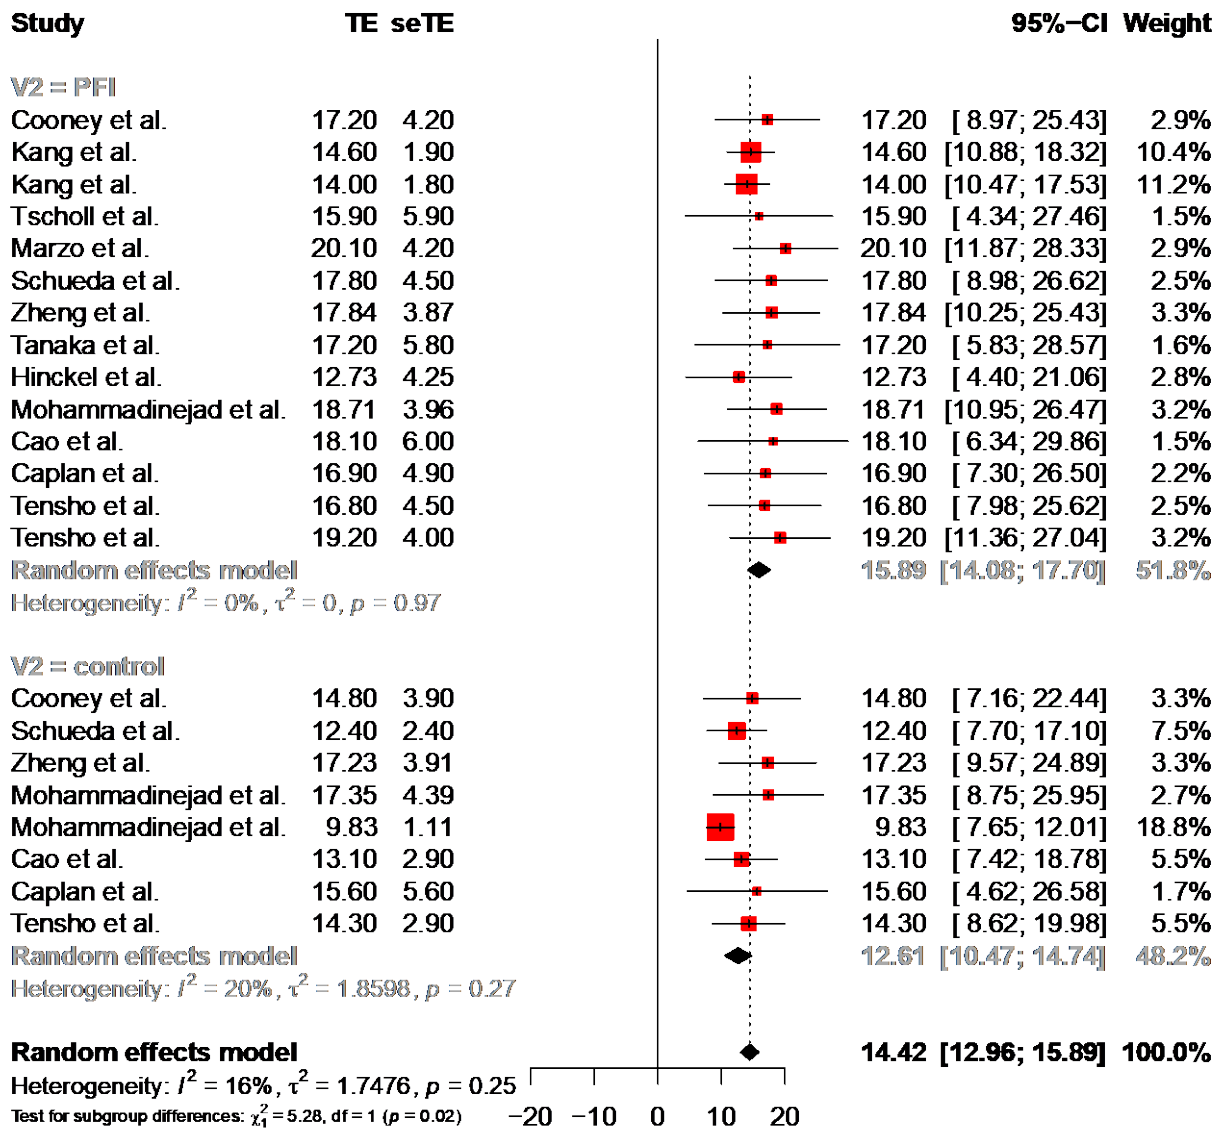

Appendix Figure A10. TT-TG on CT, PFI vs. Control

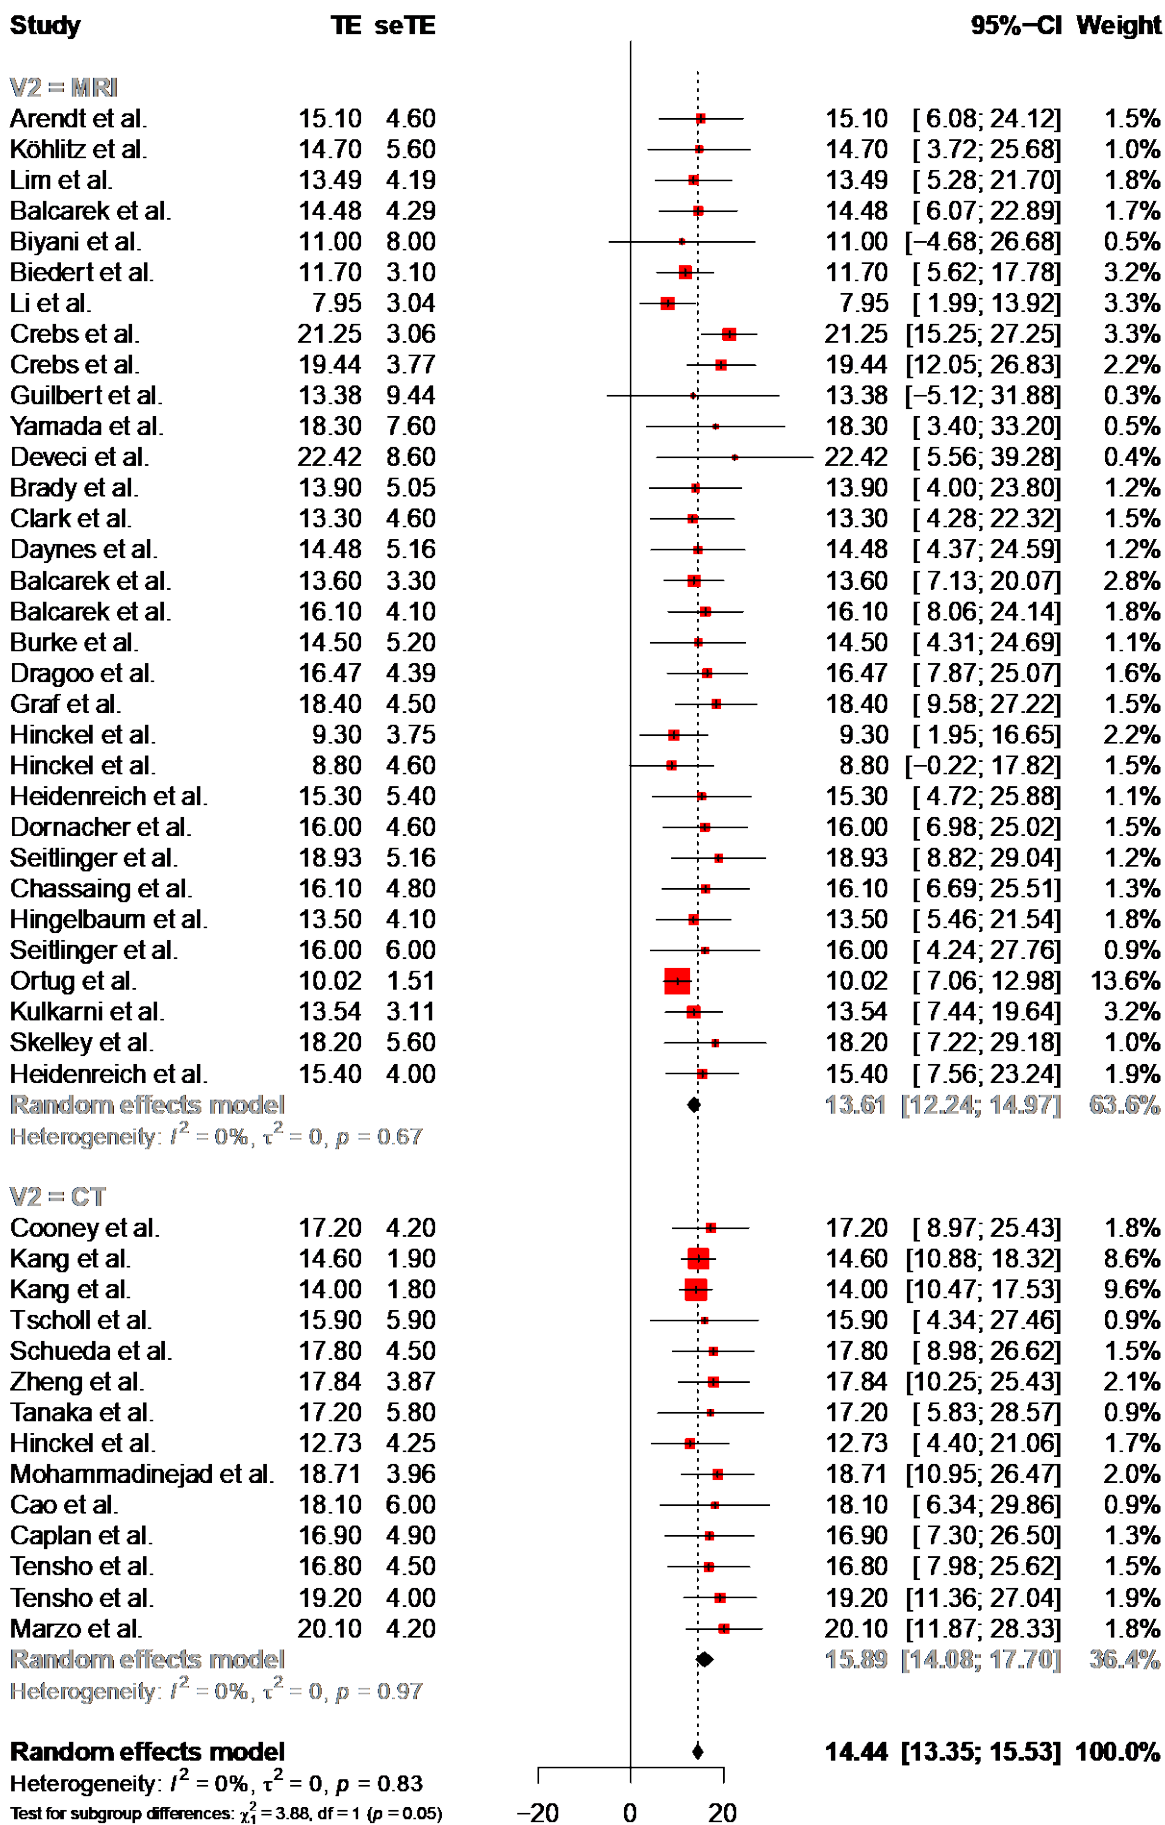

Appendix Figure A11. TT-TG, MRI vs. CT
