# Supplementary material for: Radiologic Measurements in the Assessment of Patellar Instability: A Systematic Review and Meta-analysis
Source: PubMed Central journal article supplement — Orthop J Sports Med. 2021 May 20;9(5):2325967121993179. doi: 10.1177/2325967121993179 (PMC8142007; doi:10.1177/2325967121993179), 2021-05-20
Supplement: sj-pdf-2-ojs-10.1177_2325967121993179.pdf [file sj-pdf-2-ojs-10.1177_2325967121993179.pdf]

## APPENDIX 2. Studies included in the systematic review

\*The measurements listed include only those that were studied in this systematic review. See the Methods section for a comprehensive explanation.

| Title                                                                                                                                                 | Lead Author | Journal                                                            | Study period | Year published | Imaging modality | # of subjects | # of males | Measurements*                                                                                                                                                                                                          |
|-------------------------------------------------------------------------------------------------------------------------------------------------------|-------------|--------------------------------------------------------------------|--------------|----------------|------------------|---------------|------------|------------------------------------------------------------------------------------------------------------------------------------------------------------------------------------------------------------------------|
| An analysis of knee anatomic imaging factors associated with primary lateral patellar dislocations.                                                   | Arendt      | European society of sports traumatology, knee surgery, arthroscopy | 2008-2012    | 2017           | MRI              | 157           | 79         | TT-TG, Insall-Salvati, Caton-Deschamps, Patellar tilt angle, Femoral sulcus angle, Trochlear groove depth, Lateral trochlear inclination angle, Trochlear facet asymmetry, Patellar trochlear index, Condyle asymmetry |
| Magnetic resonance imaging-based topographical differences between control and recurrent patellofemoral instability patients                          | Charles     | The American Journal of Sports Medicine                            | 2006-2010    | 2013           | MRI              | 121           |            | Congruence angle, Trochlear groove depth, Sulcus angle, Lateral trochlear inclination angle, TT-TG, Insall-Salvati, Caton-Deschamps, Trochlear groove depth,                                                           |
| Evaluation of trochlear dysplasia using MRI: correlation between the classification system of Dejour and objective parameters of trochlear dysplasia. | Nelitz      | Knee Surgery, Sports Traumatology, Arthroscopy                     | 2009-2011    | 2012           | MRI              | 78            | 34         | Dejour classification, Trochlear groove depth, Trochlear facet asymmetry, Lateral trochlear Inclination angle, Condylar asymmetry                                                                                      |
| Prevalence and patterns of anatomical risk factors in patients after patellar dislocation: a case control study using MRI.                            | Köhlitz     | European Society of Radiology                                      | 2000-2012    | 2012           | MRI              | 364           | 158        | TT-TG, Insall-Salvati, Caton-Deschamps, Trochlear groove depth, Lateral trochlear inclination angle, Trochlear facet asymmetry                                                                                         |
| Magnetic resonance imaging analysis of rotational alignment in patients with patellar dislocations.                                                   | Diederichs  | The American Journal of Sports Medicine                            |              | 2013           | MRI              | 60            | 20         | Knee rotation angle, Tibial torsion                                                                                                                                                                                    |
| The intra- and inter-rater reliability of X-ray radiological measurements for patellar instability.                                                   | Smith       | The Knee                                                           | 2008-2009    | 2012           | Xray             | 51            | 23         | Sulcus angle, Congruence angle, Insall-Salvati, Caton-Deschamps, Blackburne-Peel, Lateral patellofemoral angle                                                                                                         |

|                                                                                                                                                                                      |             |                                                                    |           |      |      |     |    |                                                                                                                                      |
|--------------------------------------------------------------------------------------------------------------------------------------------------------------------------------------|-------------|--------------------------------------------------------------------|-----------|------|------|-----|----|--------------------------------------------------------------------------------------------------------------------------------------|
| Comparative study of magnetic resonance imaging (MRI) parameters in a Southeast Asian population with symptomatic patellofemoral instability.                                        | Lim         | The Knee                                                           | 2010-2014 | 2016 | MRI  | 128 | 78 | Sulcus angle, Insall-Salvati, Caton-Deschamps, TT-TG                                                                                 |
| Surgical Treatment With Closing-Wedge Distal Femoral Osteotomy for Recurrent Patellar Dislocation With Genu Valgum                                                                   | Nha         | The American Journal of Sports Medicine                            | 2012-2015 | 2018 | Xray | 14  | 9  | TT-TG, Caton-Deschamps, Congruence angle, Patellar lateral displacement shift, Lateral patellofemoral angle                          |
| Geometry of Torsional Malalignment Syndrome: Trochlear Dysplasia but Not Torsion Predicts Lateral Patellar Instability.                                                              | Balcarek    | The Orthopaedic Journal of Sports Medicine                         | 2015-2017 | 2019 | MRI  | 91  | 13 | TT-TG, Dejour classification, TT-PCL, Lateral trochlear inclination, Tibial torsion, Knee rotation angle                             |
| Anatomical factors influencing patellar tracking in the unstable patellofemoral joint                                                                                                | Biyani      | Knee Surgery, Sports Traumatology, Arthroscopy                     |           | 2014 | MRI  | 7   | 1  | TT-TG, Insall-Salvati, Caton Deschamps, Lateral trochlear inclination                                                                |
| Arthroscopic lateral retinacular release, medial retinacular plication and partial medial tibial tubercle transfer for recurrent patellar dislocation                                | Chen        | International Journal of Surgery                                   | 1998-2012 | 2017 | Xray | 71  | 11 | TT-TG, Congruence angle, Lateral Patellofemoral angle                                                                                |
| Medial patellofemoral ligament anatomy: is it a predisposing factor for lateral patellar dislocation?                                                                                | de Oliveira | International Society of Orthopaedic Surgery and Traumatology      | 2011-2012 | 2014 | MRI  | 121 | 55 | MPFL thickness                                                                                                                       |
| Lateral retinaculum plasty instead of lateral retinacular release with concomitant medial patellofemoral ligament reconstruction can achieve better results for patellar dislocation | Liu         | European Society of Sports Traumatology, Knee Surgery, Arthroscopy | 2012-2014 | 2017 | CT   | 59  | 22 | TT-TG, Insall-Salvati, Patellar tilt angle, Congruence angle, Sulcus angle, Patellar later displacement shift, Dejour classification |

|                                                                                                                                                                                        |          |                                                                    |           |      |      |    |    |                                                                                                                                              |
|----------------------------------------------------------------------------------------------------------------------------------------------------------------------------------------|----------|--------------------------------------------------------------------|-----------|------|------|----|----|----------------------------------------------------------------------------------------------------------------------------------------------|
| Medial retinaculum plasty versus medial patellofemoral ligament reconstruction for recurrent patellar instability in adults: a randomized controlled trial                             | Ma       | The Journal of Arthroscopic and Related Surgery                    | 2008-2010 | 2013 | CT   | 63 | 22 | TT-TG, Congruence angle, Patellar tilt angle, Sulcus angle, Patellar lateral displacement shift                                              |
| Study on the patellofemoral joint using magnetic resonance imaging: Morphological variation of the medial patellofemoral ligament                                                      | Netto    | Revista Brasileira de Ortopedia                                    | 2010-2011 | 2012 | MRI  | 18 | 7  | Trochlear groove depth, Trochlear sulcus angle, Lateral patellofemoral angle, Lateral trochlear inclination angle, Trochlear facet asymmetry |
| Radiographic parameters associated with lateral patella degeneration in young patients                                                                                                 | Noehren  | Knee Surgery, Sports Traumatology, Arthroscopy                     |           | 2012 | Xray | 28 | 12 | TT-TG, Congruence angle, Sulcus angle, Lateral patellofemoral angle, Dejour classification                                                   |
| Reconstruction of the medial patellofemoral ligament and reinforcement of the medial patellotibial ligament is an effective treatment for patellofemoral instability with patella alta | Yang     | European Society of Sports Traumatology, Knee Surgery, Arthroscopy | 2009-2014 | 2018 | Xray | 58 | 25 | TT-TG, Patellar tilt angle, Patellar lateral displacement shift, Insall-Salvati, Caton-Deschamps                                             |
| Medial patellofemoral ligament reconstruction fails to correct mild patella alta in cases of patellofemoral instability—a case-control study                                           | Roessler | International Society of Orthopaedic Surgery and Traumatology      | 2010-2015 | 2018 | Xray | 64 | 26 | Insall-Salvati, Caton-Deschamps, Blackburne-Peel                                                                                             |
| Patellar height measurement in trochlear dysplasia.                                                                                                                                    | Barnett  | Knee Surgery, Sports Traumatology, Arthroscopy                     | 2002-2005 | 2009 | MRI  | 28 |    | Patellar trochlear index, Insall-Salvati, Blackburne-Peel, Caton-Deschamps                                                                   |
| The lateral condyle index: A new index for assessing the length of the lateral articular trochlea as predisposing factor for patellar instability                                      | Biedert  | International Society of Orthopaedic Surgery and Traumatology      |           | 2011 | MRI  | 69 | 49 | TT-TG, Patellar trochlear index                                                                                                              |

|                                                                                                                                                            |          |                                                 |           |      |      |     |    |                                                                                                                                      |
|------------------------------------------------------------------------------------------------------------------------------------------------------------|----------|-------------------------------------------------|-----------|------|------|-----|----|--------------------------------------------------------------------------------------------------------------------------------------|
| Quantitative magnetic resonance imaging in patellar tendon-lateral femoral condyle friction syndrome: relationship with subtle patellofemoral instability. | Li       | Skeletal Radiology                              | 2014-2017 | 2019 | MRI  | 156 | 68 | Insall-Salvati Ratio, TT-TG, Trochlear groove depth, Lateral patellofemoral angle, Lateral trochlear inclination angle               |
| Anterior-posterior trochlear measurements of normal and dysplastic trochlea by axial magnetic resonance imaging.                                           | Biedert  | Knee Surgery, Sports Traumatology, Arthroscopy  |           | 2009 | MRI  |     | 84 |                                                                                                                                      |
| Effectiveness of Fulkerson Osteotomy with Femoral Nerve Stimulation for Patients with Severe Femoral Trochlear Dysplasia                                   | Crebs    | The Iowa Orthopaedic Journal                    |           | 2015 | MRI  | 42  | 18 | Femoral sulcus angle, Lateral trochlear inclination, Caton-Deschamps, TT-TG                                                          |
| The relationship between quadriceps angle and tibial tuberosity-trochlear groove distance in patients with patellar instability                            | Cooney   | Knee Surgery, Sports Traumatology, Arthroscopy  |           | 2012 | CT   | 34  | 14 | TT-TG                                                                                                                                |
| Axial MRI index of patellar engagement: A new method to assess patellar instability                                                                        | Guilbert | Orthopaedics & Traumatology, Surgery & Research | 2010-2012 | 2013 | MRI  | 180 |    | TT-TG, Caton-Deschamps, Patellar tilt angle, MPFL                                                                                    |
| An analysis of the medial patellofemoral ligament length change pattern using open-MRI.                                                                    | Higuchi  | Knee Surgery, Sports Traumatology, Arthroscopy  |           | 2009 | Xray | 20  | 10 | Insall-Salvati ratio, Sulcus angle, Patellar tilt angle, Congruence angle, MPFL                                                      |
| Comparison of 2 different techniques for anatomic reconstruction of the medial patellofemoral ligament: a prospective randomized study                     | Kang     | The American Journal of Sports Medicine         | 2008-2009 | 2013 | CT   | 82  | 32 | Congruence angle, TT-TG, Sulcus angle, Lateral patellofemoral angle, Patellar tilt angle, Lateral displacement shift, Insall-Salvati |

|                                                                                                                                                                                                                                                     |           |                                                 |           |      |      |     |    |                                                                                         |
|-----------------------------------------------------------------------------------------------------------------------------------------------------------------------------------------------------------------------------------------------------|-----------|-------------------------------------------------|-----------|------|------|-----|----|-----------------------------------------------------------------------------------------|
| Conventional Radiographs and Magnetic Resonance Imaging for the Analysis of Trochlear Dysplasia: The Influence of Selected Levels on Magnetic Resonance Imaging.                                                                                    | Tscholl   | The American Journal of Sports Medicine         |           | 2017 | CT   | 210 | 54 | Caton-Deschamps, Insall-Salvati, Dejour classification, TT-TG, Patellar trochlear index |
| Correlation of 3D Shift and 3D Tilt of the Patella in Patients With Recurrent Dislocation of the Patella and Healthy Volunteers: An In Vivo Analysis Based on 3-Dimensional Computer Models.                                                        | Yamada    | The American Journal of Sports Medicine         |           | 2017 | MRI  | 71  | 16 | TT-TG , Dejour classification, Sulcus angle, Insall-Salvati, Wiberg's classification    |
| Are metric parameters sufficient alone in evaluation of the patellar instability? New angular measuring parameters: The trochlear groove-patellar tendon angle and the trochlear groove-dome angle                                                  | Deveci    | Journal of Orthopaedic Surgery                  |           | 2017 | MRI  | 41  | 13 | TT-TG                                                                                   |
| Medial patellofemoral ligament reconstruction reduces radiographic measures of patella alta in adults                                                                                                                                               | Woodmass; | The Orthopaedic Journal of Sports Medicine      | 2005-2013 | 2018 | Xray | 32  | 11 | Insall-Salvati, Caton-Deschamps, Blackburne-Peel                                        |
| The Tibial Tubercle-to-Trochlear Groove Distance Is Reliable in the Setting of Trochlear Dysplasia, and Superior to the Tibial Tubercle-to-Posterior Cruciate Ligament Distance When Evaluating Coronal Malalignment in Patellofemoral Instability. | Brady     | The Journal of Arthroscopic and Related Surgery | 2006-2013 | 2017 | MRI  | 239 | 99 | TT-TG, TT-PCL, Dejour classification                                                    |

|                                                                                                                                                                |           |                                                              |           |      |      |     |    |                                                                         |
|----------------------------------------------------------------------------------------------------------------------------------------------------------------|-----------|--------------------------------------------------------------|-----------|------|------|-----|----|-------------------------------------------------------------------------|
| Comparison of a Novel Weightbearing Cone Beam Computed Tomography Scanner Versus a Conventional Computed Tomography Scanner for Measuring Patellar Instability | Marzo     | The Orthopaedic Journal of Sports Medicine                   |           | 2016 | CT   | 20  | 8  | Patellar tilt angle, Congruence angle, TT-TG                            |
| Increased Magnetic Resonance Imaging Signal of the Lateral Patellar Facet Cartilage: A Functional Marker for Patellar Instability?                             | Falkowski | The American Journal of Sports Medicine                      | 2011-2014 | 2017 | MRI  | 22  | 4  | Insall-Salvati, Wiberg's classification, TT-TG                          |
| Patellar Articular Overlap on MRI Is a Simple Alternative to Conventional Measurements of Patellar Height.                                                     | Munch     | The Orthopaedic Journal of Sports Medicine                   |           | 2016 | MRI  | 239 |    | Modified Insall-Salvati, Caton-Deschamps, Blackburne-Peel               |
| Plateau-patella angle: An option for the evaluation of patellar height in patients with patellar instability.                                                  | Bonadio,  | The Knee                                                     | 2010-2015 | 2017 | Xray | 69  | 18 | Insall-Salvati, Caton-Deschamps, Blackburne-Peel                        |
| Mapping the contact area of the patellofemoral joint: the relationship between stability and joint congruence.                                                 | Clark     | The Bone & Joint Journal                                     |           | 2019 | MRI  | 40  | 19 | TT-TG, Insall-Salvati, Blackburne-Peel, Dejour Classification           |
| Patella Height Correlates With Trochlear Dysplasia: A Computed Tomography Image Analysis                                                                       | Ferlic    | Arthroscopy: The Journal of Arthroscopic and Related Surgery | 1996-2013 | 2018 | CT   | 66  | 11 | Femoral sulcus angle, Trochlear facet asymmetry, Trochlear groove depth |
| Patellar Tendon-Trochlear Groove Angle Measurement: A New Method for Patellofemoral Rotational Analyses.                                                       | Hinckel   | Skeletal Radiology                                           | 2008-2013 | 2015 | MRI  | 182 | 18 | TT-TG                                                                   |

|                                                                                                                                                                   |           |                                                                    |           |      |      |     |    |                                               |
|-------------------------------------------------------------------------------------------------------------------------------------------------------------------|-----------|--------------------------------------------------------------------|-----------|------|------|-----|----|-----------------------------------------------|
| Tibial Tuberosity-Posterior Cruciate Ligament Distance.                                                                                                           | Daynes    | The Journal of Knee Surgery                                        | 2012-2014 | 2015 | MRI  | 126 |    | TT-TG, TT-PCL                                 |
| Vastus medialis obliquus muscle morphology in primary and recurrent lateral patellar instability                                                                  | Balcarek  | BioMed Research International                                      |           | 2014 | MRI  | 82  | 41 | TT-TG, Insall-Salvati, Dejour classification  |
| Clinical Utility of Continuous Radial Magnetic Resonance Imaging Acquisition at 3 T in Real-time Patellofemoral Kinematic Assessment: A Feasibility Study         | Burke     | Arthroscopy: The Journal of Arthroscopic and Related Surgery       | 2015-2016 | 2018 | MRI  | 30  | 14 | TT-TG, Insall-Salvati, Trochlear groove depth |
| Medial patellofemoral ligament repair versus reconstruction for recurrent patellar instability: Two-year results of an algorithm-based approach                   | Dragoo    | The Orthopaedic Journal of Sports Medicine                         | 2007-2010 | 2017 | MRI  | 24  | 4  | TT-TG                                         |
| Increased Femoral Anteversion Influence Over Surgically Treated Recurrent Patellar Instability Patients                                                           | Franciozi | Arthroscopy: The Journal of Arthroscopic and Related Surgery       | 2008-2013 | 2017 | Xray | 48  | 12 | TT-TG, Caton-Deschamps, Dejour Classification |
| Q-vector measurements: physical examination versus magnetic resonance imaging measurements and their relationship with tibial tubercle-trochlear groove distance. | Graf      | European Society of Sports Traumatology, Knee Surgery, Arthroscopy | 2010-2011 | 2017 | MRI  | 49  | 19 | TT-TG, Sulcus angle, Patellar tilt angle      |
| Clinical Outcomes After Isolated Medial Patellofemoral Ligament Reconstruction for Patellar Instability Among Patients With Trochlear Dysplasia                   | Liu       | The American Journal of Sports Medicine                            | 2006-2014 | 2018 | Xray | 121 | 33 | TT-TG, Caton-Deschamps, Dejour Classification |

|                                                                                                                                                                 |          |                                                                    |           |      |           |     |     |                                                                                               |
|-----------------------------------------------------------------------------------------------------------------------------------------------------------------|----------|--------------------------------------------------------------------|-----------|------|-----------|-----|-----|-----------------------------------------------------------------------------------------------|
| Clinical and Radiological Predictors of Functional Outcome After Isolated Medial Patellofemoral Ligament Reconstruction at Midterm Follow-up.                   | Neri     | The American Journal of Sports Medicine                            | 2007-2017 | 2019 | CT        | 107 | 53  | TT-TG, Merchant angle, Caton-Deschamps                                                        |
| Comparison of native axial radiographs with axial MR imaging for determination of the trochlear morphology in patients with trochlear dysplasia.                | Salzmann | Archives of Orthopaedic and Trauma Surgery                         |           | 2009 | MRI, Xray | 24  | 8   | Sulcus angle, Lateral trochlear inclination angle, Dejour classification                      |
| Use of computed tomography to determine the risk of patellar dislocation in 921 patients with patellar instability.                                             | Schueda  | Open Access Journal of Sports Medicine                             | 2001-2009 | 2015 | CT        | 921 | 363 | Knee rotation angle, Tibial torsion angle, TT-TG, Sulcus angle, Patellar tilt, Insall-Salvati |
| Incidence and radiologic predictor of postoperative patellar instability after Fulkerson procedure of the tibial tuberosity for recurrent patellar dislocation. | Tsuda    | Knee Surgery, Sports Traumatology, Arthroscopy                     | 1996-2002 | 2011 | CT        | 41  | 8   | TT-TG, Insall-Salvati, Congruence angle, Trochlear groove depth                               |
| A combined procedure with Bereiter-type trochleoplasty leads to a stable patellofemoral joint at 5-year follow-up                                               | Wind     | European Society of Sports Traumatology, Knee Surgery, Arthroscopy | 2004-2011 | 2019 | Xray      | 21  | 6   | Sulcus angle, Trochlear groove depth                                                          |
| Patellar Height Measurements on Radiograph and Magnetic Resonance Imaging in Patellar Instability and Control Patients.                                         | Yue      | The Journal of Knee Surgery                                        | 2008-2012 | 2017 | MRI       | 241 | 128 | Insall-Salvati, Modified Insall-Salvati, Blackburne-Peel, Caton-Deschamps                     |



|                                                                                                                                                                                          |             |                                                                    |           |      |         |    |    |                                             |
|------------------------------------------------------------------------------------------------------------------------------------------------------------------------------------------|-------------|--------------------------------------------------------------------|-----------|------|---------|----|----|---------------------------------------------|
| Surgical medial patellofemoral ligament reconstruction versus non-surgical treatment of acute primary patellar dislocation: a prospective controlled trial                               | Zheng       | International Society of Orthopaedic Surgery and Traumatology      |           | 2019 | CT      | 69 | 29 | TT-TG, Caton-Deschamps, Patellar tilt angle |
| Correlation between Changes in Tibial Tuberosity-Trochlear Groove Distance and Patellar Position during Active Knee Extension on Dynamic Kinematic Computed Tomographic Imaging          | Tanaka      | Arthroscopy: The Journal of Arthroscopic and Related Surgery       | 2009-2013 | 2015 | CT      | 38 | 13 | TT-TG, Patellar tilt angle, Bisect offset   |
| Are the osseous and tendinous-cartilaginous tibial tuberosity-trochlear groove distances the same on CT and MRI?                                                                         | Hinckel     | Skeletal Radiology                                                 | 2008-2013 | 2015 | CT, MRI | 43 |    | TT-TG                                       |
| Why are bone and soft tissue measurements of the TT-TG distance on MRI different in patients with patellar instability?                                                                  | Hinckel     | Knee Surgery, Sports Traumatology, Arthroscopy                     | 2008-2013 | 2016 | MRI     | 53 | 9  | TT-TG                                       |
| The contribution of the tibial tubercle to patellar instability: analysis of tibial tubercle–trochlear groove (TT-TG) and tibial tubercle–posterior cruciate ligament (TT-PCL) distances | Heidenreich | Knee Surgery, Sports Traumatology, Arthroscopy                     | 2003-2011 | 2017 | MRI     | 54 | 24 | TT-TG, TT-PCL                               |
| Excessive lateral patellar translation on axial computed tomography indicates positive patellar J sign.                                                                                  | Xue         | European Society of Sports Traumatology, Knee Surgery, Arthroscopy | 2015-2017 | 2018 | CT      | 53 | 46 | Bisect offset, Patellar tilt angle          |

|                                                                                                                                                                  |            |                                                                    |           |      |      |     |    |                                                     |
|------------------------------------------------------------------------------------------------------------------------------------------------------------------|------------|--------------------------------------------------------------------|-----------|------|------|-----|----|-----------------------------------------------------|
| Measurement of tibial tuberosity-trochlear groove distance: evaluation of inter- and intraobserver correlation dependent on the severity of trochlear dysplasia. | Dornacher  | Knee Surgery, Sports Traumatology, Arthroscopy                     |           | 2014 | MRI  | 98  | 50 | TT-TG, Dejour classification                        |
| Tibial tubercle-posterior cruciate ligament distance: a new measurement to define the position of the tibial tubercle in patients with patellar dislocation.     | Seitlinger | The American Journal of Sports Medicine                            | 2009      | 2012 | MRI  | 79  | 13 | TT-TG, TT-PCL, Sulcus angle, Tibial torsion         |
| Influence of posterior lateral femoral condyle geometry on patellar dislocation.                                                                                 | Gillespie  | Archives of Orthopaedic and Trauma Surgery                         | 2009-2011 | 2015 | Xray | 100 |    | Femoral sulcus angle, Blackburne-Peel               |
| Tibial tubercle torsion, a new factor of patellar instability.                                                                                                   | Chassaing  | Orthopaedics & Traumatology: Surgery & Research                    | 2011-2016 | 2017 | MRI  | 92  | 50 | TT-TG, Patellar tilt angle, Tibial tubercle torsion |
| The introduction of a new MRI index to evaluate sagittal patellofemoral engagement.                                                                              | Dejour     | Orthopaedics & Traumatology: Surgery & Research                    | 2010-2011 | 2013 | MRI  | 180 |    | Caton-Deschamps                                     |
| Imaging characteristics of contralateral asymptomatic patellofemoral joints in patients with unilateral instability.                                             | Demehri    | Radiology                                                          | 2009-2013 | 2014 | CT   | 50  | 18 | TT-TG, Trochlear groove depth, Bisect offset        |
| Correlation of the tibial tuberosity-trochlear groove distance with the Q-angle.                                                                                 | Dickschas  | European Society of Sports Traumatology, Knee Surgery, Arthroscopy | 2011      | 2016 | CT   | 55  | 19 | TT-TG                                               |

|                                                                                                                                                      |            |                                                                                     |           |      |      |     |     |                                                                     |
|------------------------------------------------------------------------------------------------------------------------------------------------------|------------|-------------------------------------------------------------------------------------|-----------|------|------|-----|-----|---------------------------------------------------------------------|
| Evaluation of different surgical methods in treating recurrent patella dislocation after three-dimensional reconstruction                            | Du         | International Society of Orthopaedic Surgery and Traumatology                       | 2011-2013 | 2017 | CT   | 68  | 15  | Congruence angle, Patellar tilt angle, Lateral patellofemoral angle |
| The Recurrent Instability of the Patella Score: A Statistically Based Model for Prediction of Long-Term Recurrence Risk After First-Time Dislocation | Hevesi     | Arthroscopy: The Journal of Arthroscopic and Related Surgery                        | 1990-2010 | 2019 | Xray | 81  | 38  | Caton-Deschamps, TT-TG, Patellar length                             |
| Middle-to long-term outcome after medial patellofemoral ligament reconstruction with Insall's proximal realignment for patellar instability          | Shimizu    | Asia-Pacific Journal of Sports Medicine, Arthroscopy, Rehabilitation and Technology | 1999-2012 | 2019 | Xray | 15  | 2   | Femoral sulcus angle                                                |
| Patellar instability treated with distal femoral osteotomy                                                                                           | Swarup     | The Knee                                                                            | 2010-2014 | 2017 | Xray | 8   | 0   | Congruence angle                                                    |
| Individualizing the Tibial Tubercle-Trochlear Groove Distance: Patellar Instability Ratios That Predict Recurrent Instability                        | Camp       | The American Journal of Sports Medicine                                             | 2008-2012 | 2015 | MRI  | 54  | 24  | TT-TG, TT-PCL, Patellar length                                      |
| The TT-TG Index: a new knee size adjusted measure method to determine the TT-TG distance.                                                            | Hingelbaum | Knee Surgery, Sports Traumatology, Arthroscopy                                      | 2009-2010 | 2014 | MRI  | 251 | 149 | TT-TG                                                               |
| The position of the tibia tubercle in 0°–90° flexion: comparing patients with patella dislocation to healthy volunteers                              | Seitlinger | Knee Surgery, Sports Traumatology, Arthroscopy                                      |           | 2014 | MRI  | 60  | 11  | TT-TG                                                               |

|                                                                                                                                                                                                   |                 |                                                                    |           |      |     |     |    |                                                                                                                                                                                  |
|---------------------------------------------------------------------------------------------------------------------------------------------------------------------------------------------------|-----------------|--------------------------------------------------------------------|-----------|------|-----|-----|----|----------------------------------------------------------------------------------------------------------------------------------------------------------------------------------|
| A new quantitative radiographic measurement of patella for patellar instability using the lateral plain radiograph: 'patellar width ratio'                                                        | Kuroda          | European Society of Sports Traumatology, Knee Surgery, Arthroscopy | 2003-2013 | 2017 | CT  | 93  | 16 | Patellar tilt angle                                                                                                                                                              |
| Short lateral posterior condyle is associated with trochlea dysplasia and patellar dislocation.                                                                                                   | Roger           | European Society of Sports Traumatology, Knee Surgery, Arthroscopy |           | 2019 | CT  | 100 | 52 | Dejour classification                                                                                                                                                            |
| Value of CT scan-assessed tibial tuberosity–trochlear groove distance in identification of patellar instability                                                                                   | Mohammadi nejad | Italian Society of Medical Radiology                               | 2014-2015 | 2016 | CT  | 63  | 21 | TT-TG                                                                                                                                                                            |
| Middle patellar tendon to posterior cruciate ligament (PT-PCL) and normalized PT-PCL: New magnetic resonance indices for tibial tubercle position in patients with patellar instability.          | Pozzi           | The Knee                                                           |           | 2018 | MRI | 90  | 36 | TT-PCL                                                                                                                                                                           |
| Ratio of the tibial tuberosity–trochlear groove distance to the tibial maximal mediolateral axis: A more reliable and standardized way to measure the tibial tuberosity–trochlear groove distance | Cao             | The Knee                                                           | 2010-2016 | 2018 | CT  | 114 | 56 | TT-TG                                                                                                                                                                            |
| Influence of tibial slope asymmetry on femoral rotation in patients with lateral patellar instability.                                                                                            | Balcarek        | Knee Surgery, Sports Traumatology, Arthroscopy                     | 2006-2010 | 2012 | MRI | 190 | 97 | Dejour classification, medial tibial slope, lateral tibial slope, slope asymmetry, anatomical distal lateral femur angle(aDLFA), mechanical proximal medial tibial angle (mPMTA) |

|                                                                                                                                         |           |                                                |           |      |      |     |     |                                                                 |
|-----------------------------------------------------------------------------------------------------------------------------------------|-----------|------------------------------------------------|-----------|------|------|-----|-----|-----------------------------------------------------------------|
| Is tibial tuberosity–trochlear groove distance an appropriate measure for the identification of knees with patellar instability?        | Caplan    | Knee Surgery, Sports Traumatology, Arthroscopy |           | 2014 | CT   | 62  | 18  | TT-TG                                                           |
| Evaluation of trochlear dysplasia severity using trochlear angle: A retrospective study based on computed tomography (CT) scans         | Dong      | Medical Science Monitor                        | 2014-2017 | 2018 | CT   | 160 | 114 | Trochlear angle                                                 |
| A clinical and radiographic approach for establishing proper tibial tubercle transfer when using quad active femoral nerve stimulation. | McDermott | The Iowa Orthopaedic Journal                   | 2008-2011 | 2013 | MRI  | 18  | 9   | TT-TG                                                           |
| Evaluation of normal tibial tubercle to trochlear groove distance in adult Turkish population.                                          | Ortug     | Nigerian Journal of Clinical Practice          | 2016-2017 | 2018 | MRI  | 200 | 103 | TT-TG                                                           |
| What components comprise the measurement of the tibial tuberosity-trochlear groove distance in a patellar dislocation population?       | Tensho    | The Journal of Bone And Joint Surgery          | 2005-2014 | 2015 | CT   | 88  | 16  | TT-TG, Knee rotation angle                                      |
| Axial linear patellar displacement: a new measurement of patellofemoral congruence.                                                     | Urch      | The American Journal of Sports Medicine        |           | 2009 | Xray | 131 |     | Congruence angle, Patellar lateral displacement                 |
| Femoral Trochlear Groove Morphometry Assessed on Oblique Coronal MR Images.                                                             | Yi        | American Journal of Roentgenology              | 2007-2013 | 2015 | MRI  | 90  | 42  | Sulcus angle, Trochlear groove depth, Trochlear facet asymmetry |

|                                                                                                                                                     |             |                                                                    |           |      |      |     |    |                                  |
|-----------------------------------------------------------------------------------------------------------------------------------------------------|-------------|--------------------------------------------------------------------|-----------|------|------|-----|----|----------------------------------|
| Patellar instability in Indian population: relevance of tibial tuberosity and trochlear groove distance.                                            | Kulkarni    | International Society of Orthopaedic Surgery and Traumatology      |           | 2016 | MRI  | 100 | 60 | TT-TG                            |
| Inter- and intraobserver reliability in the MRI measurement of the tibial tubercle-trochlear groove distance and trochlea dysplasia.                | Skelley     | The American Journal of Sports Medicine                            |           | 2015 | MRI  | 116 | 59 | TT-TG, trochlear dysplasia index |
| TT-TG vs. modified lateral patellar edge for determination of tibial tubercle transfer distance in Fulkerson osteotomy procedures.                  | Edwards     | The Knee                                                           | 2006-2012 | 2016 | MRI  | 32  | 15 | TT-TG, LPE                       |
| Individualizing the tibial tubercle to trochlear groove distance to patient specific anatomy improves sensitivity for recurrent instability.        | Heidenreich | European Society of Sports Traumatology, Knee Surgery, Arthroscopy | 1990-2010 | 2017 | MRI  | 87  | 42 | TT-TG, Patellar length           |
| The trochlear isometric point is different in patients with recurrent patellar instability compared to controls: a radiographical study.            | Campos      | Knee Surgery, Sports Traumatology, Arthroscopy                     |           | 2017 | Xray | 60  | 30 | Schottle's Point, boss height    |
| Comparative analysis of medial patellofemoral ligament length change pattern in patients with patellar dislocation using open-MRI.                  | Arai        | European Society of Sports Traumatology, Knee Surgery, Arthroscopy |           | 2017 | MRI  | 20  | 8  | MPFL length                      |
| Quantitative stress radiography of the patella and evaluation of patellar laxity before and after lateral release for recurrent dislocation patella | Niimoto T   | Knee Surgery, Sports Traumatology, Arthroscopy                     | 2007-2011 | 2014 | Xray | 33  | 11 |                                  |

|                                                                                                                                                                   |         |                                                                    |           |      |     |     |    |                                                      |
|-------------------------------------------------------------------------------------------------------------------------------------------------------------------|---------|--------------------------------------------------------------------|-----------|------|-----|-----|----|------------------------------------------------------|
| Alignment in the transverse plane, but not sagittal or coronal plane, affects the risk of recurrent patella dislocation.                                          | Takagi  | European Society of Sports Traumatology, Knee Surgery, Arthroscopy |           | 2017 | CT  | 27  | 2  | 3D external tibial torsion, 3D knee rotational angle |
| Quantification Of Trochlea Dysplasia Via Computed Tomography: Assessment Of Morphology Difference Between Control And Chronic Patellofemoral Instability Patients | Voss    | The Knee                                                           | 2007-2012 | 2017 | CT  | 136 | 69 | Trochlear groove length                              |
| Clinical Accuracy of J-Sign Measurement Compared to Magnetic Resonance Imaging.                                                                                   | Beckert | The Iowa Orthopedic Journal                                        |           | 2016 | MRI | 10  | 3  |                                                      |
| Lateralization of the Tibial Tubercle in Recurrent Patellar Dislocation                                                                                           | Tensho  | The Journal of Bone & Joint Surgery                                | 2005-2017 | 2018 | CT  | 132 | 36 | TT-TG, TT-PCL                                        |
