# Supplementary material for: Radiologic Measurements in the Assessment of Patellar Instability: A Systematic Review and Meta-analysis
Source: PubMed Central journal article supplement — Orthop J Sports Med. 2021 May 20;9(5):2325967121993179. doi: 10.1177/2325967121993179 (PMC8142007; doi:10.1177/2325967121993179), 2021-05-20
Supplement: sj-pdf-3-ojs-10.1177_2325967121993179.pdf [file sj-pdf-3-ojs-10.1177_2325967121993179.pdf]

### APPENDIX 3: Risk-of-Bias Assessments

#### Newcastle-Ottawa Quality Assessment Scale for Cohort and Case-Control Studies

| Authors            | Title                                                                                                                                                                                                                                               | Type of Study | Selection (1 pt each) |   |   |   | Comparability (2 pts) | Outcome/Exposure (1 pt each) |   |   | TOTAL |
|--------------------|-----------------------------------------------------------------------------------------------------------------------------------------------------------------------------------------------------------------------------------------------------|---------------|-----------------------|---|---|---|-----------------------|------------------------------|---|---|-------|
|                    |                                                                                                                                                                                                                                                     |               | 1                     | 2 | 3 | 4 | 1                     | 1                            | 2 | 3 |       |
| Arai et al.        | Comparative analysis of medial patellofemoral ligament length change pattern in patients with patellar dislocation using open-MRI.                                                                                                                  | Case control  | 1                     | 0 | 0 | 1 | 0                     | 1                            | 1 | 1 | 5     |
| Arendt et al.      | An analysis of knee anatomic imaging factors associated with primary lateral patellar dislocations.                                                                                                                                                 | Cohort        | 1                     | 1 | 1 | 1 | 0                     | 0                            | 1 | 1 | 6     |
| Balcarek et al.    | Vastus medialis obliquus muscle morphology in primary and recurrent lateral patellar instability                                                                                                                                                    | Case control  | 1                     | 1 | 0 | 1 | 1                     | 0                            | 1 | 1 | 6     |
| Balcarek et al.    | Geometry of Torsional Malalignment Syndrome: Trochlear Dysplasia but Not Torsion Predicts Lateral Patellar Instability.                                                                                                                             | Case control  | 1                     | 1 | 0 | 0 | 1                     | 0                            | 1 | 1 | 5     |
| Balcarek et al.    | Influence of tibial slope asymmetry on femoral rotation in patients with lateral patellar instability.                                                                                                                                              | Case control  | 1                     | 1 | 1 | 1 | 2                     | 0                            | 1 | 1 | 8     |
| Barnett et al.     | Patellar height measurement in trochlear dysplasia.                                                                                                                                                                                                 | Case control  | 1                     | 1 | 0 | 0 | 0                     | 1                            | 0 | 0 | 3     |
| Biedert et al.     | The lateral condyle index: A new index for assessing the length of the lateral articular trochlea as predisposing factor for patellar instability                                                                                                   | Case control  | 1                     | 1 | 1 | 1 | 0                     | 1                            | 1 | 1 | 7     |
| Biedert et al.     | Anterior-posterior trochlear measurements of normal and dysplastic trochlea by axial magnetic resonance imaging.                                                                                                                                    | Case control  | 1                     | 1 | 1 | 1 | 0                     | 0                            | 1 | 1 | 6     |
| Brady et al.       | The Tibial Tubercle-to-Trochlear Groove Distance Is Reliable in the Setting of Trochlear Dysplasia, and Superior to the Tibial Tubercle-to-Posterior Cruciate Ligament Distance When Evaluating Coronal Malalignment in Patellofemoral Instability. | Case control  | 1                     | 1 | 1 | 1 | 2                     | 1                            | 1 | 1 | 9     |
| Burke et al.       | Clinical Utility of Continuous Radial Magnetic Resonance Imaging Acquisition at 3 T in Real-time Patellofemoral Kinematic Assessment: A Feasibility Study                                                                                           | Case control  | 1                     | 1 | 1 | 1 | 1                     | 0                            | 1 | 1 | 7     |
| Campos et al.      | The trochlear isometric point is different in patients with recurrent patellar instability compared to controls: a radiographical study.                                                                                                            | Case control  | 1                     | 1 | 1 | 1 | 2                     | 0                            | 1 | 1 | 8     |
| Cao et al.         | Ratio of the tibial tuberosity-trochlear groove distance to the tibial maximal mediolateral axis: A more reliable and standardized way to measure the tibial tuberosity-trochlear groove distance                                                   | Case control  | 1                     | 1 | 1 | 1 | 2                     | 0                            | 1 | 1 | 8     |
| Caplan et al.      | Is tibial tuberosity-trochlear groove distance an appropriate measure for the identification of knees with patellar instability?                                                                                                                    | Case control  | 1                     | 1 | 1 | 1 | 2                     | 1                            | 1 | 1 | 9     |
| Charles et al.     | Magnetic resonance imaging-based topographical differences between control and recurrent patellofemoral instability patients                                                                                                                        | Case control  | 1                     | 1 | 1 | 1 | 0                     | 0                            | 1 | 1 | 6     |
| Chassaing et al.   | Tibial tubercle torsion, a new factor of patellar instability.                                                                                                                                                                                      | Case control  | 1                     | 1 | 1 | 1 | 0                     | 0                            | 1 | 1 | 6     |
| Clark et al.       | Mapping the contact area of the patellofemoral joint: the relationship between stability and joint congruence.                                                                                                                                      | Case control  | 1                     | 1 | 0 | 1 | 2                     | 0                            | 1 | 1 | 7     |
| Cooney et al.      | The relationship between quadriceps angle and tibial tuberosity-trochlear groove distance in patients with patellar instability                                                                                                                     | Case control  | 1                     | 1 | 1 | 1 | 2                     | 0                            | 1 | 1 | 8     |
| Daynes et al.      | Tibial Tuberosity-Posterior Cruciate Ligament Distance.                                                                                                                                                                                             | Case control  | 0                     | 1 | 1 | 0 | 0                     | 0                            | 1 | 1 | 4     |
| de Oliveira et al. | Medial patellofemoral ligament anatomy: is it a predisposing factor for lateral patellar dislocation?                                                                                                                                               | Case control  | 1                     | 1 | 1 | 1 | 0                     | 0                            | 1 | 1 | 6     |
| Dejour et al.      | The introduction of a new MRI index to evaluate sagittal patellofemoral engagement.                                                                                                                                                                 | Case control  | 1                     | 1 | 1 | 1 | 2                     | 0                            | 1 | 1 | 8     |
| Demehri et al.     | Imaging characteristics of contralateral asymptomatic patellofemoral joints in patients with unilateral instability.                                                                                                                                | Case control  | 1                     | 1 | 1 | 1 | 2                     | 1                            | 0 | 1 | 8     |
| Deveci et al.      | Are metric parameters sufficient alone in evaluation of the patellar instability? New angular measuring parameters: The trochlear groove-patellar tendon angle and the trochlear groove-dome angle                                                  | Case control  | 1                     | 0 | 1 | 1 | 2                     | 0                            | 1 | 1 | 7     |
| Diederichs et al.  | Magnetic resonance imaging analysis of rotational alignment in patients with patellar dislocations.                                                                                                                                                 | Case control  | 1                     | 1 | 1 | 1 | 2                     | 0                            | 1 | 1 | 8     |
| Dong et al.        | Evaluation of trochlear dysplasia severity using trochlear angle: A retrospective study based on computed tomography (CT) scans                                                                                                                     | Case control  | 1                     | 1 | 1 | 1 | 2                     | 1                            | 1 | 1 | 9     |
| Domacher et al.    | Measurement of tibial tuberosity-trochlear groove distance: evaluation of inter- and intraobserver correlation dependent on the severity of trochlear dysplasia.                                                                                    | Case control  | 0                     | 1 | 0 | 1 | 0                     | 1                            | 1 | 1 | 5     |
| Gillespie et al.   | Influence of posterior lateral femoral condyle geometry on patellar dislocation.                                                                                                                                                                    | Case-Control  | 1                     | 1 | 1 | 1 | 1                     | 1                            | 1 | 1 | 8     |
| Guilbert et al.    | Axial MRI index of patellar engagement: A new method to assess patellar instability                                                                                                                                                                 | Case-Control  | 1                     | 1 | 1 | 1 | 0                     | 1                            | 1 | 1 | 7     |
| Heidenreich et al. | The contribution of the tibial tubercle to patellar instability: analysis of tibial tubercle-trochlear groove (TT-TG) and tibial tubercle-posterior cruciate ligament (TT-PCL) distances                                                            | Cohort        | 1                     | 0 | 0 | 1 | 0                     | 1                            | 1 | 1 | 5     |

|                    |                                                                                                                                                                                          |              |   |   |   |   |   |   |   |   |   |
|--------------------|------------------------------------------------------------------------------------------------------------------------------------------------------------------------------------------|--------------|---|---|---|---|---|---|---|---|---|
| Heidenreich et al. | Individualizing the tibial tubercle to trochlear groove distance to patient specific anatomy improves sensitivity for recurrent instability.                                             | Cohort       | 1 | 1 | 1 | 1 | 0 | 1 | 1 | 1 | 7 |
| Hinckel et al.     | Patellar Tendon-Trochlear Groove Angle Measurement: A New Method for Patellofemoral Rotational Analyses.                                                                                 | Cohort       | 1 | 1 | 1 | 1 | 0 | 1 | 1 | 1 | 7 |
| Hinckel et al.     | Are the osseous and tendinous-cartilaginous tibial tuberosity-trochlear groove distances the same on CT and MRI?                                                                         | Case-Control | 0 | 1 | 1 | 1 | 0 | 0 | 1 | 1 | 5 |
| Hingelbaum et al.  | The TT-TG Index: a new knee size adjusted measure method to determine the TT-TG distance.                                                                                                | Case-Control | 0 | 0 | 1 | 1 | 0 | 1 | 1 | 1 | 5 |
| Köhlitz et al.     | Prevalence and patterns of anatomical risk factors in patients after patellar dislocation: a case control study using MRI.                                                               | Case-Control | 1 | 0 | 1 | 1 | 2 | 1 | 1 | 1 | 8 |
| Kuroda et al.      | A new quantitative radiographic measurement of patella for patellar instability using the lateral plain radiograph: 'patellar width ratio'                                               | Case-Control | 1 | 1 | 1 | 1 | 2 | 1 | 1 | 1 | 9 |
| Li et al.          | Quantitative magnetic resonance imaging in patellar tendon-lateral femoral condyle friction syndrome: relationship with subtle patellofemoral instability.                               | Case-Control | 1 | 1 | 1 | 1 | 0 | 1 | 1 | 1 | 7 |
| Lim et al.         | Comparative study of magnetic resonance imaging (MRI) parameters in a Southeast Asian population with symptomatic patellofemoral instability.                                            | Case-Control | 1 | 1 | 1 | 1 | 1 | 1 | 1 | 1 | 8 |
| Ma et al.          | Medial retinaculum plasty versus medial patellofemoral ligament reconstruction for recurrent patellar instability in adults: a randomized controlled trial                               | Cohort       | 1 | 1 | 1 | 1 | 2 | 1 | 1 | 1 | 9 |
| Mohammadinejad     | Value of CT scan-assessed tibial tuberosity-trochlear groove distance in identification of patellar instability                                                                          | Case-Control | 1 | 1 | 1 | 1 | 2 | 1 | 1 | 1 | 9 |
| Munch et al.       | Patellar Articular Overlap on MRI Is a Simple Alternative to Conventional Measurements of Patellar Height.                                                                               | Cohort       | 1 | 1 | 1 | 1 | 1 | 1 | 1 | 1 | 8 |
| Noehren et al.     | Radiographic parameters associated with lateral patella degeneration in young patients                                                                                                   | Cohort       | 1 | 1 | 1 | 1 | 2 | 1 | 1 | 1 | 9 |
| Pozzi et al.       | Middle patellar tendon to posterior cruciate ligament (PT-PCL) and normalized PT-PCL: New magnetic resonance indices for tibial tubercle position in patients with patellar instability. | Case-Control | 1 | 1 | 1 | 1 | 0 | 1 | 1 | 1 | 7 |
| Roessler et al.    | Medial patellofemoral ligament reconstruction fails to correct mild patella alta in cases of patellofemoral instability—a case-control study                                             | Case-Control | 1 | 1 | 1 | 1 | 2 | 1 | 1 | 1 | 9 |
| Roger et al.       | Short lateral posterior condyle is associated with trochlea dysplasia and patellar dislocation.                                                                                          | Case-Control | 1 | 1 | 1 | 1 | 1 | 1 | 1 | 1 | 8 |
| Schueda et al.     | Use of computed tomography to determine the risk of patellar dislocation in 921 patients with patellar instability.                                                                      | Case-Control | 1 | 1 | 1 | 1 | 1 | 0 | 0 | 1 | 6 |
| Seitlinger et al.  | The position of the tibia tubercle in 0°–90° flexion: comparing patients with patella dislocation to healthy volunteers                                                                  | Case-Control | 1 | 1 | 1 | 1 | 2 | 1 | 1 | 1 | 9 |
| Seitlinger et al.  | Tibial tubercle-posterior cruciate ligament distance: a new measurement to define the position of the tibial tubercle in patients with patellar dislocation.                             | Cohort       | 1 | 1 | 1 | 1 | 2 | 1 | 1 | 1 | 9 |
| Skelley et al.     | Inter- and intraobserver reliability in the MRI measurement of the tibial tubercle-trochlear groove distance and trochlea dysplasia.                                                     | Cohort       | 1 | 1 | 1 | 1 | 1 | 1 | 1 | 1 | 8 |
| Takagi et al.      | Alignment in the transverse plane, but not sagittal or coronal plane, affects the risk of recurrent patella dislocation.                                                                 | Cohort       | 1 | 1 | 1 | 1 | 1 | 1 | 1 | 1 | 8 |
| Tensho et al.      | What components comprise the measurement of the tibial tuberosity-trochlear groove distance in a patellar dislocation population?                                                        | Case-Control | 1 | 1 | 1 | 1 | 2 | 1 | 1 | 1 | 9 |
| Tensho et al.      | Lateralization of the Tibial Tubercle in Recurrent Patellar Dislocation                                                                                                                  | Case-Control | 1 | 1 | 1 | 1 | 2 | 1 | 1 | 1 | 9 |
| Tscholl et al.     | Conventional Radiographs and Magnetic Resonance Imaging for the Analysis of Trochlear Dysplasia: The Influence of Selected Levels on Magnetic Resonance Imaging.                         | Cohort       | 1 | 0 | 1 | 0 | 0 | 1 | 1 | 1 | 5 |
| Tsuda et al.       | Incidence and radiologic predictor of postoperative patellar instability after Fulkerson procedure of the tibial tuberosity for recurrent patellar dislocation.                          | Case-Control | 1 | 1 | 1 | 1 | 0 | 1 | 0 | 0 | 5 |
| Urch et al.        | Axial linear patellar displacement: a new measurement of patellofemoral congruence.                                                                                                      | Cohort       | 1 | 1 | 1 | 1 | 0 | 1 | 1 | 1 | 7 |
| Voss et al.        | Quantification Of Trochlea Dysplasia Via Computed Tomography: Assessment Of Morphology Difference Between Control And Chronic Patellofemoral Instability Patients                        | Case-Control | 1 | 1 | 1 | 1 | 0 | 1 | 1 | 1 | 7 |
| Xue et al.         | Excessive lateral patellar translation on axial computed tomography indicates positive patellar J sign.                                                                                  | Case-Control | 1 | 1 | 1 | 1 | 2 | 1 | 1 | 1 | 9 |

|               |                                                                                                                                                                                              |              |   |   |   |   |   |   |   |   |   |
|---------------|----------------------------------------------------------------------------------------------------------------------------------------------------------------------------------------------|--------------|---|---|---|---|---|---|---|---|---|
| Yamada et al. | Correlation of 3D Shift and 3D Tilt of the Patella in Patients With Recurrent Dislocation of the Patella and Healthy Volunteers: An In Vivo Analysis Based on 3-Dimensional Computer Models. | Case-Control | 1 | 0 | 0 | 1 | 1 | 1 | 0 | 1 | 5 |
| Yi et al.     | Femoral Trochlear Groove Morphometry Assessed on Oblique Coronal MR Images.                                                                                                                  | Case-Control | 1 | 1 | 1 | 1 | 2 | 1 | 1 | 1 | 9 |
| Yue et al.    | Patellar Height Measurements on Radiograph and Magnetic Resonance Imaging in Patellar Instability and Control Patients.                                                                      | Cohort       | 1 | 1 | 1 | 0 | 0 | 1 | 1 | 1 | 6 |
| Zheng et al.  | Surgical medial patellofemoral ligament reconstruction versus non-surgical treatment of acute primary patellar dislocation: a prospective controlled trial                                   | Cohort       | 1 | 1 | 1 | 1 | 2 | 1 | 1 | 1 | 9 |
| Crebs et al.  | Effectiveness of Fulkerson Osteotomy with Femoral Nerve Stimulation for Patients with Severe Femoral Trochlear Dysplasia                                                                     | Cohort       | 1 | 0 | 1 | 1 | 0 | 1 | 1 | 1 | 6 |

7.16667

## Cochrane Risk-of-Bias Assessment for Randomized Controlled Trials

| Author      | Title                                                                                                                                                                                | Domain 1 |     |    |               | Domain 2 |     |     |     |     |     |     | Domain 3 |     |     |     |     | Domain 4 |     |     |    |     | Domain 5 |               |     |     | overall risk of bias |          |               |
|-------------|--------------------------------------------------------------------------------------------------------------------------------------------------------------------------------------|----------|-----|----|---------------|----------|-----|-----|-----|-----|-----|-----|----------|-----|-----|-----|-----|----------|-----|-----|----|-----|----------|---------------|-----|-----|----------------------|----------|---------------|
|             |                                                                                                                                                                                      | 1.1      | 1.2 | 1  | total         | 2.1      | 2.2 | 2.3 | 2.4 | 2.5 | 2.6 | 2.7 | total    | 3.1 | 3.2 | 3.3 | 3.4 | total    | 4.1 | 4.2 | 4  | 4.4 | 4.5      | total         | 5.1 | 5.2 |                      | 5.3      | total         |
| Kang et al. | Comparison of 2 different techniques for anatomic reconstruction of the medial patellofemoral ligament: a prospective randomized study                                               | Y        | PY  | N  | low risk      | PY       | Y   | N   | NA  | NA  | Y   | NA  | low risk | Y   | NA  | NA  | NA  | low risk | N   | N   | PY | PY  | PN       | some concerns | Y   | N   | N                    | low risk | some concerns |
| Liu et al.  | Lateral retinaculum plasty instead of lateral retinacular release with concomitant medial patellofemoral ligament reconstruction can achieve better results for patellar dislocation | Y        | NI  | N  | low risk      | PY       | Y   | N   | NA  | NA  | Y   | NA  | low risk | Y   | NA  | NA  | NA  | low risk | N   | PN  | PY | PY  | PN       | some concerns | Y   | N   | N                    | low risk | some concerns |
| Du et al.   | Evaluation of different surgical methods in treating recurrent patella dislocation after three-dimensional reconstruction                                                            | NI       | NI  | PN | some concerns | PY       | Y   | N   | NA  | NA  | Y   | NA  | low risk | Y   | NA  | NA  | NA  | low risk | N   | PN  | PY | PY  | PN       | some concerns | Y   | N   | N                    | low risk | some concerns |

## Joanna Briggs Critical Appraisal Tool for Case-Series

| Authors          | Title                                                                                                                                                                                   | Type of Study | Item 1  | Item 2  | Item 3  | Item 4  | Item 5  | Item 6  | Item 7 | Item 8  | Item 9  | Item 10 | Assessment |
|------------------|-----------------------------------------------------------------------------------------------------------------------------------------------------------------------------------------|---------------|---------|---------|---------|---------|---------|---------|--------|---------|---------|---------|------------|
| Falkowski et al. | Increased Magnetic Resonance Imaging Signal of the Lateral Patellar Facet Cartilage: A Functional Marker for Patellar Instability?                                                      | Case Series   | Yes     | Unclear | Yes     | Unclear | Yes     | Yes     | Yes    | Yes     | No      | Yes     | Low Risk   |
| Feric et al.     | Patella Height Correlates With Trochlear Dysplasia: A Computed Tomography Image Analysis                                                                                                | Case Series   | Yes     | Unclear | Yes     | Unclear | Yes     | Yes     | No     | Yes     | No      | Yes     | Low Risk   |
| Francoizi et al. | Increased Femoral Anteversion Influence Over Surgically Treated Recurrent Patellar Instability Patients                                                                                 | Case Series   | Yes     | Yes     | Yes     | Yes     | Yes     | Yes     | Yes    | Yes     | No      | Yes     | Low Risk   |
| Graf et al.      | Q-vector measurements: physical examination versus magnetic resonance imaging measurements and their relationship with tibial tubercle-trochlear groove distance.                       | Case Series   | Yes     | Yes     | Yes     | Yes     | Yes     | Yes     | No     | Yes     | No      | Yes     | Low Risk   |
| Hevesi et al.    | The Recurrent Instability of the Patella Score: A Statistically Based Model for Prediction of Long-Term Recurrence Risk After First-Time Dislocation                                    | Case Series   | Yes     | Yes     | Unclear | Unclear | Unclear | Yes     | No     | Yes     | No      | Yes     | Low Risk   |
| Higuchi et al.   | An analysis of the medial patellofemoral ligament length change pattern using open-MRI.                                                                                                 | Case Series   | No      | Yes     | Yes     | No      | No      | Yes     | No     | Yes     | No      | Yes     | Low Risk   |
| Hinckel et al.   | Why are bone and soft tissue measurements of the TT-TG distance on MRI different in patients with patellar instability?                                                                 | Case Series   | Yes     | Yes     | Yes     | Yes     | Yes     | Yes     | No     | Yes     | Yes     | Yes     | Low Risk   |
| Kulkarni et al.  | Patellar instability in Indian population: relevance of tibial tuberosity and trochlear groove distance.                                                                                | Case Series   | Yes     | Yes     | Yes     | No      | No      | Yes     | No     | Yes     | No      | Yes     | Low Risk   |
| Liu et al.       | Clinical Outcomes After Isolated Medial Patellofemoral Ligament Reconstruction for Patellar Instability Among Patients With Trochlear Dysplasia                                         | Case Series   | Yes     | Yes     | Yes     | Yes     | Yes     | Yes     | No     | Yes     | No      | Yes     | Low Risk   |
| McDermott et al. | A clinical and radiographic approach for establishing proper tibial tubercle transfer when using quad active femoral nerve stimulation.                                                 | Case Series   | Yes     | Yes     | Yes     | No      | No      | Yes     | No     | Yes     | No      | N/A     | Low Risk   |
| Neri et al.      | Clinical and Radiological Predictors of Functional Outcome After Isolated Medial Patellofemoral Ligament Reconstruction at Midterm Follow-up.                                           | Case Series   | Yes     | Yes     | Yes     | Yes     | No      | Yes     | No     | Yes     | No      | Yes     | Low Risk   |
| Netto et al.     | Study on the Patellofemoral Joint Using Magnetic Resonance Imaging: Morphological Variations of the Medial Patellofemoral Ligament                                                      | Case Series   | No      | Yes     | Unclear | No      | No      | Yes     | No     | Yes     | Yes     | Yes     | Low Risk   |
| Nha et al.       | Surgical Treatment With Closing-Wedge Distal Femoral Osteotomy for Recurrent Patellar Dislocation With Genu Valgum                                                                      | Case Series   | Yes     | Yes     | Yes     | Yes     | Yes     | Yes     | No     | Yes     | No      | Yes     | Low Risk   |
| Nimoto et al.    | Quantitative stress radiography of the patella and evaluation of patellar laxity before and after lateral release for recurrent dislocation patella                                     | Case Series   | Yes     | Yes     | Yes     | No      | No      | Yes     | No     | Yes     | No      | Yes     | Low Risk   |
| Ortug et al.     | Evaluation of normal tibial tubercle to trochlear groove distance in adult Turkish population.                                                                                          | Case Series   | Yes     | Yes     | Yes     | Unclear | Unclear | Yes     | No     | Yes     | Yes     | Yes     | Low Risk   |
| Salzmann et al.  | Comparison of native axial radiographs with axial MR imaging for determination of the trochlear morphology in patients with trochlear dysplasia.                                        | Case Series   | no      | Yes     | Yes     | no      | no      | Yes     | no     | Yes     | no      | Yes     | Low Risk   |
| Shimizu et al.   | Middle-to long-term outcome after medial patellofemoral ligament reconstruction with Insall's proximal realignment for patellar instability                                             | Case Series   | Yes     | Unclear | Yes     | Unclear | Unclear | Yes     | no     | yes     | no      | Yes     | Low Risk   |
| Smith et al.     | The intra- and inter-rater reliability of X-ray radiological measurements for patellar instability.                                                                                     | Case Series   | Unclear | Yes     | Yes     | Yes     | Yes     | Yes     | Yes    | no      | no      | Yes     | Low Risk   |
| Swarup et al.    | Patellar instability treated with distal femoral osteotomy                                                                                                                              | Case Series   | Yes     | Yes     | Yes     | Yes     | Yes     | Yes     | Yes    | Yes     | no      | Yes     | Low Risk   |
| Tanaka et al.    | Correlation between Changes in Tibial Tuberosity-Trochlear Groove Distance and Patellar Position during Active Knee Extension on Dynamic Kinematic Computed Tomographic Imaging         | Case Series   | Yes     | Yes     | Yes     | Yes     | Yes     | Yes     | Yes    | no      | no      | Yes     | Low Risk   |
| Wind et al.      | A combined procedure with Bereiter-type trochleoplasty leads to a stable patellofemoral joint at 5-year follow-up                                                                       | Case Series   | Yes     | Yes     | Yes     | Yes     | Yes     | no      | no     | yes     | no      | Yes     | Low Risk   |
| Woodmass et al.  | Medial patellofemoral ligament reconstruction reduces radiographic measures of patella alta in adults                                                                                   | Case Series   | Yes     | unclear | unclear | Yes     | Yes     | yes     | no     | no      | no      | yes     | Low Risk   |
| Yang et al.      | Reconstruction of the medial patellofemoral ligament and reinforcement of the medial patellofemoral ligament is an effective treatment for patellofemoral instability with patella alta | Case series   | Yes     | No      | No      | Yes     | Yes     | Yes     | Yes    | Yes     | Unclear | Yes     | Low Risk   |
| Beckert et al.   | Clinical Accuracy of J-Sign Measurement Compared to Magnetic Resonance Imaging.                                                                                                         | Case series   | Yes     | Yes     | Yes     | Yes     | Yes     | Yes     | Yes    | no      | no      | Yes     | Low Risk   |
| Byani et al.     | Anatomical factors influencing patellar tracking in the unstable patellofemoral joint                                                                                                   | Case series   | unclear | no      | no      | no      | no      | unclear | no     | no      | no      | Yes     | High Risk  |
| Bonadio et al.   | Plateau-patella angle: An option for the evaluation of patellar height in patients with patellar instability.                                                                           | Case series   | Yes     | no      | no      | Yes     | Yes     | unclear | no     | no      | no      | Yes     | High Risk  |
| Camp et al.      | Individualizing the Tibial Tubercle-Trochlear Groove Distance: Patellar Instability Ratios That Predict Recurrent Instability                                                           | case series   | Yes     | Yes     | Yes     | No      | No      | Yes     | No     | Yes     | No      | Yes     | Low Risk   |
| Chen et al.      | Arthroscopic lateral retinacular release, medial retinacular plication and partial medial tibial tubercle transfer for recurrent patellar dislocation                                   | case series   | yes     | yes     | yes     | yes     | yes     | yes     | yes    | yes     | no      | yes     | Low Risk   |
| Dickschas et al. | Correlation of the tibial tuberosity-trochlear groove distance with the Q-angle.                                                                                                        | case series   | Yes     | Yes     | Yes     | Yes     | Yes     | Yes     | yes    | no      | no      | Yes     | Low Risk   |
| Dragoo et al.    | Medial patellofemoral ligament repair versus reconstruction for recurrent patellar instability: Two-year results of an algorithm-based approach                                         | case series   | Yes     | Yes     | Yes     | Yes     | Yes     | Yes     | Yes    | Yes     | no      | Yes     | Low Risk   |
| Edwards et al.   | TT-TG vs. modified lateral patellar edge for determination of tibial tubercle transfer distance in Fulkerson osteotomy procedures.                                                      | case series   | Yes     | Yes     | Yes     | Yes     | Yes     | Yes     | Yes    | unclear | no      | no      | Low Risk   |
| Neitz et al.     | Evaluation of trochlear dysplasia using MRI: correlation between the classification system of Dejour and objective parameters of trochlear dysplasia.                                   | case series   | Yes     | Yes     | Yes     | Yes     | No      | No      | No     | Yes     | no      | no      | Low Risk   |
| Marzo et al.     | Comparison of a Novel Weightbearing Cone Beam Computed Tomography Scanner Versus a Conventional Computed Tomography Scanner for Measuring Patellar Instability                          | Case series   | Yes     | Yes     | Yes     | Unclear | No      | Yes     | No     | Yes     | no      | Yes     | Low Risk   |
